# Supplementary material for: TfWRKY40 positively regulates diosgenin biosynthesis in Trigonella foenum-graecum L.
Source: Frontiers journal article supplement (doi:10.3389/fpls.2025.1666107), 2025-09-24
Supplement: Table_1.xlsx [file Table_1.xlsx]

## Sheet: Suppl. Table S1
Supplementary Table S1. Primers used in this study
Primer Name	Primer Sequence (5'-3')	Primer Usage
TfActin-F	TCGCTGCTGAGGTTTTGGAA	Amplification of internal reference gene (TfActin) fragments for qRT-PCR
TfActin-R	CCAATTTCGCCTTTGCCCTT
TfWRKY40-qPCR-F	GCCATGTAGGGATATTTCCTCACC	Amplification of TfWRKY40 gene fragments for qRT-PCR
TfWRKY40-qPCR-R	CAGCTTGGAGCATATGAGCACCTA
TfWRKY40-OE-F	ACGGGGGACTCTAGAGGATCCATGGAATCAACATGCGTGGATA	Cloning the coding sequence of the TfWRKY40 gene for construction of an overexpression vector
TfWRKY40-OE-R	CGATCGGGGAAATTCGAGCTCTCACCATTTGGCCTTATTAGAAGTAT
TfWRKY40-RNAi-F	GGGGACAAGTTTGTACAAAAAAGCAGGCTGGTTCTTGTGAAGACAGAAGCATC	Cloning a specific 273-bp fragment of the TfWRKY40 coding region for constructing a RNAi vector
TfWRKY40-RNAi-R	GGGGACCACTTTGTACAAGAAAGCTGGGTAAAGGAGCTTCTTCACTTTGAGTTG
pHB-TfWRKY40-GFP-F	CTCTCTCTCAAGCTTGGATCCATGGAATCAACATGCGTGGATA	Cloning the TfWRKY40 coding sequence to construct an expression vector for subcellular localization
pHB-TfWRKY40-GFP-R	AGAACCACGGGTCATGAGCTCCCATTTGGCCTTATTAGAAGTATGG

## Sheet: Suppl. Table S2
Supplementary Table S1. Transcriptome sequencing source data associated with diosgenin biosynthetic genes in Trigonella foenum-graecum hairy roots overexpressing or silencing TfWRKY40, relative to their corresponding controls.
Gene_ID	OE_empty_1	OE_empty_2	OE_empty_3	TfWRKY40_OE_1	TfWRKY40_OE_2	TfWRKY40_OE_3	RNAi_empty_1	RNAi_empty_2	RNAi_empty_3	TfWRKY40_RNAi_1	TfWRKY40_RNAi_2	TfWRKY40_RNAi_3	Gene Length	NR GI	NR ID	NR Score	NR Evalue	NR Description	NT GI	NT ID	NT Score	NT Evalue	NT Description	KO ID	KO Name	KO Description	Http Link	Swissprot ID	Swissprot Score	Swissprot Evalue	Swissprot Description	PFAM ID	PFAM description	Gene Ontology Biological Pathway	BP Description	Gene Ontology Molecular Function	MF Description	Gene Ontology Cellular Component	CC Description	KOG ID	KOG Description
TRINITY_DN1997_c0_g1 (ACAT1)	26.96	25.66	21.88	29.49	28.98	29.09	60.83	54.3	51.35	34.55	73.35	69.87	1819	XP_003618039.1		1946	1.49e-271	acetyl-CoA acetyltransferase, cytosolic 1 [Medicago truncatula]||XP_024639132.1 acetyl-CoA acetyltransferase, cytosolic 1 [Medicago truncatula]||XP_039687629.1 acetyl-CoA acetyltransferase, cytosolic 1 [Medicago truncatula]||AET00998.1 peroxisomal acetoacetyl-coenzyme A thiolase [Medicago truncatula]||RHN58167.1 putative acetyl-CoA C-acetyltransferase [Medicago truncatula]||RHN65271.1 putative ac…	XM_024783364.2	XM_024783364	1206	0	PREDICTED: Medicago truncatula acetyl-CoA acetyltransferase, cytosolic 1 (LOC11424070), transcript variant X2, mRNA	K00626	ACAT, atoB	acetyl-CoA C-acetyltransferase	http://www.genome.jp/dbget-bin/www_bget?ko:K00626	Q8S4Y1	1692	1.49e-234	Acetyl-CoA acetyltransferase, cytosolic 1 OS=Arabidopsis thaliana OX=3702 GN=AAT1 PE=1 SV=1	PF02803//PF00108	Thiolase, C-terminal domain//Thiolase, N-terminal domain	--	--	GO:0016747	acyltransferase activity, transferring groups other than amino-acyl groups	--	--	KOG1390	Acetyl-CoA acetyltransferase
TRINITY_DN4642_c0_g1 (ACAT2)	76.41	72.99	71.5	64.07	66.19	68.21	48.01	49.71	50.84	71.77	35.65	42.62	2586	KEH32696.1		1276	4.92e-168	peroxisomal acetoacetyl-coenzyme A thiolase [Medicago truncatula]	XM_013603208.3	XM_013603208	683	0	PREDICTED: Medicago truncatula acetyl-CoA acetyltransferase, cytosolic 1 (LOC25494326), mRNA	K00626	ACAT, atoB	acetyl-CoA C-acetyltransferase	http://www.genome.jp/dbget-bin/www_bget?ko:K00626	Q8S4Y1	1042	6.11e-133	Acetyl-CoA acetyltransferase, cytosolic 1 OS=Arabidopsis thaliana OX=3702 GN=AAT1 PE=1 SV=1	PF00108//PF02803	Thiolase, N-terminal domain//Thiolase, C-terminal domain	--	--	GO:0016747	acyltransferase activity, transferring groups other than amino-acyl groups	--	--	KOG1390	Acetyl-CoA acetyltransferase
TRINITY_DN4642_c1_g1 (ACAT3)	6.45	5.03	9.15	15.3	3.71	5.59	5.88	3.64	1.79	2.19	3.14	2.2	488	GAU49376.1		223	3.92e-19	hypothetical protein TSUD_177250 [Trifolium subterraneum]	XM_020375143.2	XM_020375143	63	1.7e-22	PREDICTED: Cajanus cajan acetyl-CoA acetyltransferase, cytosolic 1 (LOC109811393), transcript variant X2, mRNA	--	--	--	--	--	--	--	--	PF13456	Reverse transcriptase-like	GO:0051252	regulation of RNA metabolic process	GO:0003676//GO:0004523	nucleic acid binding//RNA-DNA hybrid ribonuclease activity	--	--	--	--
TRINITY_DN6609_c0_g1 (HMGS1)	66.04	68.82	64.27	60.75	64.19	66.32	105.05	109.24	93.41	69.81	118.04	104.93	1799	XP_003611167.1		2345	0	hydroxymethylglutaryl-CoA synthase [Medicago truncatula]||AES94125.1 3-hydroxy-3-methylglutaryl coenzyme A synthase [Medicago truncatula]||RHN53652.1 putative hydroxymethylglutaryl-CoA synthase [Medicago truncatula]	XM_003611119.4	XM_003611119	1335	0	PREDICTED: Medicago truncatula hydroxymethylglutaryl-CoA synthase (LOC11429131), mRNA	K01641	HMGCS	hydroxymethylglutaryl-CoA synthase	http://www.genome.jp/dbget-bin/www_bget?ko:K01641	P54873	1920	2.17e-268	Hydroxymethylglutaryl-CoA synthase OS=Arabidopsis thaliana OX=3702 GN=HMGS PE=1 SV=2	PF10384//PF08540//PF04115	Centromere protein Scm3//Hydroxymethylglutaryl-coenzyme A synthase C terminal//Ureidoglycolate lyase	GO:0006574//GO:0006144//GO:0006550//GO:0000256//GO:0046950//GO:0010142//GO:0006552//GO:0006084	valine catabolic process//purine nucleobase metabolic process//isoleucine catabolic process//allantoin catabolic process//cellular ketone body metabolic process//farnesyl diphosphate biosynthetic process, mevalonate pathway//leucine catabolic process//acetyl-CoA metabolic process	GO:0050385//GO:0004421//GO:0042393	ureidoglycolate lyase activity//hydroxymethylglutaryl-CoA synthase activity//histone binding	GO:0005634	nucleus	KOG1393	Hydroxymethylglutaryl-CoA synthase
TRINITY_DN15019_c0_g1 (HMGS2)	9.51	9.38	9.21	7.71	10.42	8.4	11.02	9.99	10.59	9.16	9.98	11.8	1779	XP_003620731.1		2311	0	hydroxymethylglutaryl-CoA synthase [Medicago truncatula]||AES76949.1 3-hydroxy-3-methylglutaryl coenzyme A synthase [Medicago truncatula]||RHN51902.1 putative hydroxymethylglutaryl-CoA synthase [Medicago truncatula]	XM_003620683.4	XM_003620683	1227	0	PREDICTED: Medicago truncatula hydroxymethylglutaryl-CoA synthase (LOC11438999), mRNA	K01641	HMGCS	hydroxymethylglutaryl-CoA synthase	http://www.genome.jp/dbget-bin/www_bget?ko:K01641	P54873	1850	7.34e-258	Hydroxymethylglutaryl-CoA synthase OS=Arabidopsis thaliana OX=3702 GN=HMGS PE=1 SV=2	PF08540	Hydroxymethylglutaryl-coenzyme A synthase C terminal	GO:0006550//GO:0010142//GO:0006574//GO:0046950//GO:0006552//GO:0006084	isoleucine catabolic process//farnesyl diphosphate biosynthetic process, mevalonate pathway//valine catabolic process//cellular ketone body metabolic process//leucine catabolic process//acetyl-CoA metabolic process	GO:0004421	hydroxymethylglutaryl-CoA synthase activity	--	--	KOG1393	Hydroxymethylglutaryl-CoA synthase
TRINITY_DN6008_c0_g2 (HMGR1)	101.2	92.76	91.72	106.15	108.46	108.52	70.84	78.72	81.26	80.49	61.71	69.31	2341	XP_003617066.1		2489	0	3-hydroxy-3-methylglutaryl-coenzyme A reductase 1 [Medicago truncatula]||AET00025.1 3-hydroxy-3-methylglutaryl-coenzyme A reductase-like protein [Medicago truncatula]||RHN57435.1 putative hydroxymethylglutaryl-CoA reductase (NADPH) [Medicago truncatula]	XM_003617018.4	XM_003617018	1637	0	PREDICTED: Medicago truncatula 3-hydroxy-3-methylglutaryl-coenzyme A reductase 1 (LOC11432311), mRNA	K00021	HMGCR	hydroxymethylglutaryl-CoA reductase (NADPH)	http://www.genome.jp/dbget-bin/www_bget?ko:K00021	P29057	2154	3.4e-299	3-hydroxy-3-methylglutaryl-coenzyme A reductase 1 OS=Hevea brasiliensis OX=3981 GN=HMGR1 PE=2 SV=1	PF00368	Hydroxymethylglutaryl-coenzyme A reductase	GO:0015936//GO:0006694	coenzyme A metabolic process//steroid biosynthetic process	GO:0004420	hydroxymethylglutaryl-CoA reductase (NADPH) activity	--	--	KOG2480	3-hydroxy-3-methylglutaryl-CoA (HMG-CoA) reductase
TRINITY_DN6008_c0_g1 (HMGR2)	4.74	6.49	6.24	4.54	5.37	4.42	5.09	4.59	3.07	1.04	2.86	3.19	2087	XP_003612421.1		2546	0	3-hydroxy-3-methylglutaryl coenzyme A reductase 2-A [Medicago truncatula]||ABY20974.1 3-hydroxy-3-methylglutaryl coenzyme A reductase 3 [Medicago truncatula]||AES95379.1 3-hydroxy-3-methylglutaryl-coenzyme A reductase-like protein [Medicago truncatula]||RHN54496.1 putative hydroxymethylglutaryl-CoA reductase (NADPH) [Medicago truncatula]	XM_003612373.4	XM_003612373	1317	0	PREDICTED: Medicago truncatula 3-hydroxy-3-methylglutaryl coenzyme A reductase 2-A (LOC11416526), mRNA	K00021	HMGCR	hydroxymethylglutaryl-CoA reductase (NADPH)	http://www.genome.jp/dbget-bin/www_bget?ko:K00021	P29057	2018	6.72e-280	3-hydroxy-3-methylglutaryl-coenzyme A reductase 1 OS=Hevea brasiliensis OX=3981 GN=HMGR1 PE=2 SV=1	PF00368	Hydroxymethylglutaryl-coenzyme A reductase	GO:0006694//GO:0015936	steroid biosynthetic process//coenzyme A metabolic process	GO:0004420	hydroxymethylglutaryl-CoA reductase (NADPH) activity	--	--	KOG2480	3-hydroxy-3-methylglutaryl-CoA (HMG-CoA) reductase
TRINITY_DN7338_c0_g1 (HMGR3)	88.92	76.71	85.59	94.28	105.31	104.61	132.34	138.64	133.47	129.3	177.04	189.73	2710	PNX95266.1		2532	0	3-hydroxy-3-methylglutaryl coenzyme a reductase [Trifolium pratense]	XM_003629008.4	XM_003629008	1516	0	PREDICTED: Medicago truncatula 3-hydroxy-3-methylglutaryl-coenzyme A reductase 1 (LOC11441531), mRNA	K00021	HMGCR	hydroxymethylglutaryl-CoA reductase (NADPH)	http://www.genome.jp/dbget-bin/www_bget?ko:K00021	P48020	2043	3.97e-280	3-hydroxy-3-methylglutaryl-coenzyme A reductase 1 OS=Solanum tuberosum OX=4113 GN=HMG1 PE=2 SV=1	PF00368	Hydroxymethylglutaryl-coenzyme A reductase	GO:0006694//GO:0015936	steroid biosynthetic process//coenzyme A metabolic process	GO:0004420	hydroxymethylglutaryl-CoA reductase (NADPH) activity	--	--	KOG2480	3-hydroxy-3-methylglutaryl-CoA (HMG-CoA) reductase
TRINITY_DN1007_c0_g2 (MVK1)	9.29	8.45	11.86	10.52	8.69	8.09	9.52	5.17	4.97	10.04	7.94	4.73	1116	XP_040868630.1		228	1.68e-17	sucrose synthase 2 isoform X1 [Glycine max]	XM_051061285.1	XM_051061285	74	3.1e-28	PREDICTED: Pisum sativum mevalonate kinase (LOC127132343), mRNA	K00695	SUS	sucrose synthase	http://www.genome.jp/dbget-bin/www_bget?ko:K00695	O24301	209	1.21e-16	Sucrose synthase 2 OS=Pisum sativum OX=3888 GN=SUS2 PE=2 SV=1	PF00288	GHMP kinases N terminal domain	--	--	GO:0005524	ATP binding	--	--	KOG1511	Mevalonate kinase MVK/ERG12
TRINITY_DN7623_c0_g6 (MVK2)	16.53	17.3	14.07	15.95	16.53	16.09	21.22	23.83	20.17	17.2	26.45	29.22	2188	XP_003626302.1		1820	9.37e-251	mevalonate kinase [Medicago truncatula]||ABD32397.1 Mevalonate and galactokinase [Medicago truncatula]||AES82520.1 mevalonate kinase [Medicago truncatula]||RHN49295.1 putative mevalonate kinase [Medicago truncatula]	XM_003626254.4	XM_003626254	1103	0	PREDICTED: Medicago truncatula mevalonate kinase (LOC11429779), mRNA	K00869	MVK, mvaK1	mevalonate kinase	http://www.genome.jp/dbget-bin/www_bget?ko:K00869	P46086	1287	9.5e-172	Mevalonate kinase OS=Arabidopsis thaliana OX=3702 GN=At5g27450 PE=2 SV=1	PF00288	GHMP kinases N terminal domain	--	--	GO:0005524	ATP binding	--	--	KOG1511	Mevalonate kinase MVK/ERG12
TRINITY_DN7576_c0_g1 (PMK1)	2	0	2.43	4.29	3.4	1.29	2.54	7.26	1.23	1.84	2.72	1.61	626	--	--	--	--	--	--	--	--	--	--	--	--	--	--	--	--	--	--	PF04275	Phosphomevalonate kinase	GO:0006694//GO:0006695	steroid biosynthetic process//cholesterol biosynthetic process	GO:0004631	phosphomevalonate kinase activity	GO:0005737	cytoplasm	--	--
TRINITY_DN8311_c0_g1 (PMK2)	10.89	8.67	9.47	11.65	11.7	10.41	18.03	23.94	21.96	15.18	24.62	25.41	1847	XP_003602220.1		2464	0	phosphomevalonate kinase, peroxisomal [Medicago truncatula]||AES72471.1 phosphomevalonate kinase [Medicago truncatula]||RHN69610.1 putative phosphomevalonate kinase [Medicago truncatula]	XM_003602172.4	XM_003602172	1421	0	PREDICTED: Medicago truncatula phosphomevalonate kinase, peroxisomal (LOC11425190), mRNA	K00938	E2.7.4.2, mvaK2	phosphomevalonate kinase	http://www.genome.jp/dbget-bin/www_bget?ko:K00938	Q9C6T1	1817	9.04e-252	Phosphomevalonate kinase, peroxisomal OS=Arabidopsis thaliana OX=3702 GN=PMK PE=1 SV=1	PF00288	GHMP kinases N terminal domain	--	--	GO:0005524	ATP binding	--	--	KOG4519	Phosphomevalonate kinase
TRINITY_DN14186_c0_g1 (MVD)	28.07	30.54	28.74	36.08	36.56	34.73	49.34	52.67	47.36	41.88	46.3	56.78	1774	XP_050892146.1		2061	4.51e-289	diphosphomevalonate decarboxylase MVD2, peroxisomal [Pisum sativum]||KAI5401649.1 Diphosphomevalonate decarboxylase mvd2 [Pisum sativum]	XM_013614833.3	XM_013614833	1120	0	PREDICTED: Medicago truncatula diphosphomevalonate decarboxylase MVD2, peroxisomal (LOC25485588), mRNA	K01597	MVD, mvaD	diphosphomevalonate decarboxylase	http://www.genome.jp/dbget-bin/www_bget?ko:K01597	F4JCU3	1751	1.67e-243	Diphosphomevalonate decarboxylase MVD2, peroxisomal OS=Arabidopsis thaliana OX=3702 GN=MVD2 PE=1 SV=1	PF00288	GHMP kinases N terminal domain	--	--	GO:0005524	ATP binding	--	--	KOG2833	Mevalonate pyrophosphate decarboxylase
TRINITY_DN9987_c0_g2 (FPS)	42.82	44.8	37.51	52.81	51.87	47.1	83.72	89.92	77.62	66.22	96.7	84.15	1340	ADC32809.1		1758	1.15e-246	farnesyl pyrophosphate synthase [Medicago sativa]	GU361537.1	GU361537	933	0	Medicago sativa farnesyl pyrophosphate synthase (FPS) mRNA, complete cds	K00787	FDPS	farnesyl diphosphate synthase	http://www.genome.jp/dbget-bin/www_bget?ko:K00787	P49351	1660	2.72e-233	Farnesyl pyrophosphate synthase 1 OS=Lupinus albus OX=3870 GN=FPS1 PE=2 SV=1	PF00348	Polyprenyl synthetase	GO:0008299	isoprenoid biosynthetic process	--	--	--	--	KOG0711	Polyprenyl synthetase
TRINITY_DN5527_c0_g1 (SQS)	101.15	104.44	98.05	106.03	116.03	114.43	187.57	196.95	187.86	143.76	239.74	236.54	2102	APA19297.1		2158	3.57e-302	squalene synthase [Trigonella foenum-graecum]	XM_003606992.3	XM_003606992	1247	0	PREDICTED: Medicago truncatula squalene synthase 2 (LOC11441556), mRNA	K00801	FDFT1	farnesyl-diphosphate farnesyltransferase	http://www.genome.jp/dbget-bin/www_bget?ko:K00801	C9E894	1854	1.75e-257	Squalene synthase 2 OS=Panax ginseng OX=4054 GN=SS2 PE=2 SV=1	PF00494//PF12009	Squalene/phytoene synthase//Telomerase ribonucleoprotein complex - RNA binding domain	GO:0006278//GO:0009058	RNA-templated DNA biosynthetic process//biosynthetic process	GO:0003964	RNA-directed DNA polymerase activity	--	--	KOG1459	Squalene synthetase
TRINITY_DN3295_c0_g1 (SQE1)	114.82	109.4	112.02	103.3	103.62	105.81	66.95	83.79	74.76	60.98	57.99	64.39	2181	APA19296.1		2717	0	squalene monooxygenase [Trigonella foenum-graecum]	KX148476.1	KX148476	1581	0	Trigonella foenum-graecum squalene monooxygenase mRNA, complete cds	K00511	SQLE, ERG1	squalene monooxygenase	http://www.genome.jp/dbget-bin/www_bget?ko:K00511	O48651	2093	2.36e-291	Squalene monooxygenase SE1 OS=Panax ginseng OX=4054 GN=SQE1 PE=2 SV=1	PF04820//PF01266//PF08491//PF07992//PF01210//PF02254//PF01494	Tryptophan halogenase//FAD dependent oxidoreductase//Squalene epoxidase//Pyridine nucleotide-disulphide oxidoreductase//NAD-dependent glycerol-3-phosphate dehydrogenase N-terminus//TrkA-N domain//FAD binding domain	GO:0046168//GO:0006813//GO:0006694//GO:0016114	glycerol-3-phosphate catabolic process//potassium ion transport//steroid biosynthetic process//terpenoid biosynthetic process	GO:0016616//GO:0051287//GO:0050660//GO:0004497//GO:0016491//GO:0071949//GO:0004506	oxidoreductase activity, acting on the CH-OH group of donors, NAD or NADP as acceptor//NAD binding//flavin adenine dinucleotide binding//monooxygenase activity//oxidoreductase activity//FAD binding//squalene monooxygenase activity	--	--	KOG1298	Squalene monooxygenase
TRINITY_DN24954_c0_g1 (SQE2)	12.23	12.73	11.08	19.02	23.4	21.74	0.53	0.87	1.62	1.22	0.69	0.7	1717	APD76301.1		2501	0	squalene epoxidase 1 [Medicago sativa]	XM_003608274.4	XM_003608274	1295	0	PREDICTED: Medicago truncatula squalene monooxygenase SE1 (LOC11415396), transcript variant X1, mRNA	K00511	SQLE, ERG1	squalene monooxygenase	http://www.genome.jp/dbget-bin/www_bget?ko:K00511	O48651	2114	4.21e-297	Squalene monooxygenase SE1 OS=Panax ginseng OX=4054 GN=SQE1 PE=2 SV=1	PF01266//PF04820//PF08491//PF01210//PF07992//PF02254//PF01494	FAD dependent oxidoreductase//Tryptophan halogenase//Squalene epoxidase//NAD-dependent glycerol-3-phosphate dehydrogenase N-terminus//Pyridine nucleotide-disulphide oxidoreductase//TrkA-N domain//FAD binding domain	GO:0006694//GO:0016114//GO:0046168//GO:0006813	steroid biosynthetic process//terpenoid biosynthetic process//glycerol-3-phosphate catabolic process//potassium ion transport	GO:0004506//GO:0016491//GO:0004497//GO:0071949//GO:0051287//GO:0016616//GO:0050660	squalene monooxygenase activity//oxidoreductase activity//monooxygenase activity//FAD binding//NAD binding//oxidoreductase activity, acting on the CH-OH group of donors, NAD or NADP as acceptor//flavin adenine dinucleotide binding	--	--	KOG1298	Squalene monooxygenase
TRINITY_DN2836_c0_g1 (CAS1)	33.51	32.91	33.5	41.69	43.11	42.49	55.2	61.35	58.97	50.06	64.06	56.84	3030	APA19295.1		3331	0	cycloartenol synthase [Trigonella foenum-graecum]	KX148475.1	KX148475	1808	0	Trigonella foenum-graecum cycloartenol synthase mRNA, complete cds	K01853	CAS1	cycloartenol synthase	http://www.genome.jp/dbget-bin/www_bget?ko:K01853	Q9SXV6	3014	0	Cycloartenol synthase OS=Glycyrrhiza glabra OX=49827 GN=GgCAS1 PE=1 SV=1	PF00432	Prenyltransferase and squalene oxidase repeat	--	--	GO:0003824	catalytic activity	--	--	--	--
TRINITY_DN12508_c0_g1 (CAS2)	0.36	1.05	0.67	0	1.35	1.83	0.98	4	2.12	1.28	0	2.24	457	RHN52974.1		173	3.9e-13	putative cycloartenol synthase [Medicago truncatula]	OX326966.1	OX326966	79	2.02e-31	Medicago arabica genome assembly, chromosome: 3	K01853	CAS1	cycloartenol synthase	http://www.genome.jp/dbget-bin/www_bget?ko:K01853	Q6BE25	140	1.64e-09	Cycloartenol synthase OS=Cucurbita pepo OX=3663 GN=CPX PE=1 SV=1	--	--	--	--	--	--	--	--	--	--
TRINITY_DN550_c0_g1 (SSR2)	169.17	179.04	167.71	216.81	217.17	221.6	429.29	444.91	418.09	363.34	554.33	565.98	2484	QCQ82762.1		2992	0	delta24-reductase [Trigonella foenum-graecum]	MK060115.1	MK060115	1677	0	Trigonella foenum-graecum delta24-reductase (SSR2) mRNA, complete cds	K09828	DHCR24, DWF1	Delta24-sterol reductase	http://www.genome.jp/dbget-bin/www_bget?ko:K09828	P93472	2837	0	Delta(24)-sterol reductase OS=Pisum sativum OX=3888 GN=DIM PE=1 SV=1	PF12679//PF01565	ABC-2 family transporter protein//FAD binding domain	GO:0055085	transmembrane transport	GO:0140359//GO:0016491//GO:0050660	ABC-type transporter activity//oxidoreductase activity//flavin adenine dinucleotide binding	--	--	KOG1262	FAD-binding protein DIMINUTO
TRINITY_DN3547_c0_g1 (SMO3-1)	6.16	6.45	7.19	9.54	8.24	9.59	15.89	21.85	13.98	7.06	14.59	14.34	1189	XP_013449292.1		1401	6.2e-194	methylsterol monooxygenase 1-1 [Medicago truncatula]||KEH23319.1 C-4 methylsterol oxidase [Medicago truncatula]	XM_013593838.3	XM_013593838	585	0	PREDICTED: Medicago truncatula methylsterol monooxygenase 1-1 (LOC25498869), mRNA	K14423	SMO1	plant 4,4-dimethylsterol C-4alpha-methyl-monooxygenase	http://www.genome.jp/dbget-bin/www_bget?ko:K14423	Q8L7W5	998	3.85e-134	Methylsterol monooxygenase 1-1 OS=Arabidopsis thaliana OX=3702 GN=SMO1-1 PE=1 SV=1	PF04116	Fatty acid hydroxylase	GO:0008610	lipid biosynthetic process	GO:0005506//GO:0016491	iron ion binding//oxidoreductase activity	--	--	KOG0873	C-4 sterol methyl oxidase
TRINITY_DN5441_c0_g1 (SMO3-2)	25.6	24.79	25.62	33.86	35.39	33.3	43.01	47.99	49.72	43.04	38.6	43.11	1407	XP_045792486.1		1555	5.1e-216	methylsterol monooxygenase 1-1-like [Trifolium pratense]	XM_003608749.4	XM_003608749	960	0	PREDICTED: Medicago truncatula methylsterol monooxygenase 1-1 (LOC11426366), mRNA	K14423	SMO1	plant 4,4-dimethylsterol C-4alpha-methyl-monooxygenase	http://www.genome.jp/dbget-bin/www_bget?ko:K14423	Q8L7W5	1228	6.31e-168	Methylsterol monooxygenase 1-1 OS=Arabidopsis thaliana OX=3702 GN=SMO1-1 PE=1 SV=1	PF04116	Fatty acid hydroxylase	GO:0008610	lipid biosynthetic process	GO:0005506//GO:0016491	iron ion binding//oxidoreductase activity	--	--	KOG0873	C-4 sterol methyl oxidase
TRINITY_DN7274_c0_g1 (CPI)	53.96	63.16	57.62	65.8	70.6	65.13	110.83	117.66	111.74	99.24	130.55	133.54	1343	AQY19165.1		1462	3.79e-202	cycloeucalenol cycloisomerase [Trigonella foenum-graecum]	KY661430.1	KY661430	816	0	Trigonella foenum-graecum cycloeucalenol cycloisomerase mRNA, complete cds	K08246	CPI1	cycloeucalenol cycloisomerase	http://www.genome.jp/dbget-bin/www_bget?ko:K08246	Q9M643	1198	5.53e-164	Cycloeucalenol cycloisomerase OS=Arabidopsis thaliana OX=3702 GN=CPI1 PE=2 SV=1	--	--	--	--	--	--	--	--	--	--
TRINITY_DN1963_c0_g1 (CYP51)	152.54	151.42	152.65	162.18	174.66	167.32	184.35	181.19	178.43	153.16	234.57	219.94	1825	XP_003626732.2		2445	0	obtusifoliol 14-alpha demethylase [Medicago truncatula]||ABC59074.1 cytochrome P450 monooxygenase CYP51G1 [Medicago truncatula]||AET01208.2 obtusifoliol-14-demethylase [Medicago truncatula]||AVQ54946.1 obtusifoliol-14-demethylase [Trigonella foenum-graecum]||RHN38594.1 putative sterol 14-alpha-demethylase [Medicago truncatula]	XM_003626684.4	XM_003626684	1395	0	PREDICTED: Medicago truncatula obtusifoliol 14-alpha demethylase (LOC11432420), mRNA	K05917	CYP51	sterol 14alpha-demethylase	http://www.genome.jp/dbget-bin/www_bget?ko:K05917	Q9SAA9	2087	3.21e-293	Sterol 14-demethylase OS=Arabidopsis thaliana OX=3702 GN=CYP51G1 PE=1 SV=1	PF00067	Cytochrome P450	--	--	GO:0020037//GO:0005506//GO:0004497//GO:0016705	heme binding//iron ion binding//monooxygenase activity//oxidoreductase activity, acting on paired donors, with incorporation or reduction of molecular oxygen	--	--	KOG0684	Cytochrome P450
TRINITY_DN1201_c0_g1 (C14-R)	52.23	55.96	60.2	68.21	71.55	68.98	107.48	109.04	103.99	98.34	125.56	120.72	2459	AQY19166.1		1285	8.08e-169	delta(14)-sterol reductase [Trigonella foenum-graecum]	KY661431.1	KY661431	704	0	Trigonella foenum-graecum delta(14)-sterol reductase mRNA, complete cds	K00222	TM7SF2, ERG24	Delta14-sterol reductase	http://www.genome.jp/dbget-bin/www_bget?ko:K00222	Q9LDR4	1179	1.94e-154	Delta(14)-sterol reductase OS=Arabidopsis thaliana OX=3702 GN=FK PE=1 SV=2	PF01222	Ergosterol biosynthesis ERG4/ERG24 family	GO:0016126	sterol biosynthetic process	GO:0016628	oxidoreductase activity, acting on the CH-CH group of donors, NAD or NADP as acceptor	GO:0016020	membrane	KOG1435	Sterol reductase/lamin B receptor
TRINITY_DN3160_c0_g1 (8,7-SI)	49.99	53.46	46.67	57.21	57.56	56.41	158.9	163.47	157.78	139.49	155.67	162.88	1203	XP_013453036.1		1058	1.02e-142	probable 3-beta-hydroxysteroid-Delta(8),Delta(7)-isomerase [Medicago truncatula]||KEH27064.1 C-8,7 sterol isomerase, putative [Medicago truncatula]||RHN52838.1 putative cholestenol Delta-isomerase [Medicago truncatula]	XM_013597582.3	XM_013597582	585	0	PREDICTED: Medicago truncatula probable 3-beta-hydroxysteroid-Delta(8),Delta(7)-isomerase (LOC25496873), mRNA	K01824	EBP	cholestenol Delta-isomerase	http://www.genome.jp/dbget-bin/www_bget?ko:K01824	O48962	747	3.51e-97	Probable 3-beta-hydroxysteroid-Delta(8),Delta(7)-isomerase OS=Arabidopsis thaliana OX=3702 GN=At1g20050 PE=2 SV=1	--	--	--	--	--	--	--	--	--	--
TRINITY_DN1545_c0_g1 (SMO4-1)	64.96	70.26	61.75	85.28	95.56	87.1	65.14	70.48	62.96	64.02	72.38	73.49	1142	PNX97002.1		1282	7.51e-176	methylsterol monooxygenase 2-2-like protein [Trifolium pratense]	XM_045956749.1	XM_045956749	605	0	PREDICTED: Trifolium pratense methylsterol monooxygenase 2-2-like (LOC123906764), mRNA	K14424	SMO2	plant 4alpha-monomethylsterol monooxygenase	http://www.genome.jp/dbget-bin/www_bget?ko:K14424	Q8VWZ8	1124	4.97e-154	Methylsterol monooxygenase 2-2 OS=Arabidopsis thaliana OX=3702 GN=SMO2-2 PE=1 SV=1	PF04116	Fatty acid hydroxylase	GO:0008610	lipid biosynthetic process	GO:0016491//GO:0005506	oxidoreductase activity//iron ion binding	--	--	KOG0873	C-4 sterol methyl oxidase
TRINITY_DN1545_c0_g3 (SMO4-2)	29.54	25.18	24.96	27.29	27.65	26.51	29.64	31.63	29.11	29.68	41.9	32.95	1129	XP_003628663.1		1422	8.03e-198	methylsterol monooxygenase 2-2 [Medicago truncatula]||AET03139.1 C-4 methylsterol oxidase [Medicago truncatula]||RHN41297.1 putative methylsterol monooxygenase [Medicago truncatula]	XM_003628615.4	XM_003628615	932	0	PREDICTED: Medicago truncatula methylsterol monooxygenase 2-2 (LOC11410003), mRNA	K14424	SMO2	plant 4alpha-monomethylsterol monooxygenase	http://www.genome.jp/dbget-bin/www_bget?ko:K14424	Q8VWZ8	1197	3.37e-165	Methylsterol monooxygenase 2-2 OS=Arabidopsis thaliana OX=3702 GN=SMO2-2 PE=1 SV=1	PF04116	Fatty acid hydroxylase	GO:0008610	lipid biosynthetic process	GO:0005506//GO:0016491	iron ion binding//oxidoreductase activity	--	--	KOG0873	C-4 sterol methyl oxidase
TRINITY_DN1545_c0_g4 (SMO4-3)	1.94	0.86	1.82	1.59	0.98	2.71	1.69	1.95	1.86	1.67	0.89	1.75	1062	PNX97002.1		303	5.11e-29	methylsterol monooxygenase 2-2-like protein [Trifolium pratense]	AC126785.11	AC126785	145	1e-67	Medicago truncatula clone mth2-9i24, complete sequence	K14424	SMO2	plant 4alpha-monomethylsterol monooxygenase	http://www.genome.jp/dbget-bin/www_bget?ko:K14424	Q8VWZ8	241	3.87e-22	Methylsterol monooxygenase 2-2 OS=Arabidopsis thaliana OX=3702 GN=SMO2-2 PE=1 SV=1	--	--	--	--	--	--	--	--	--	--
TRINITY_DN1871_c0_g1 (C5-SD2)	28.69	30.36	27.88	31.25	28.66	29.67	60.93	63.02	60.46	49.25	82.67	92.08	1200	XP_045818152.1		1364	8.03e-188	delta(7)-sterol-C5(6)-desaturase-like [Trifolium pratense]	XM_045962196.1	XM_045962196	599	0	PREDICTED: Trifolium pratense delta(7)-sterol-C5(6)-desaturase-like (LOC123910904), mRNA	K00227	SC5DL, ERG3	Delta7-sterol 5-desaturase	http://www.genome.jp/dbget-bin/www_bget?ko:K00227	Q9ZT29	1129	2.1e-154	Delta(7)-sterol-C5(6)-desaturase OS=Nicotiana tabacum OX=4097 PE=2 SV=1	PF04116	Fatty acid hydroxylase	GO:0008610	lipid biosynthetic process	GO:0005506//GO:0016491	iron ion binding//oxidoreductase activity	--	--	KOG0872	Sterol C5 desaturase
TRINITY_DN17630_c0_g1 (7-DR2)	98.08	90.29	97.74	112.55	103.12	102.57	175.09	185.23	162.06	130.15	194.77	212.4	1836	XP_045811853.1		2289	0	7-dehydrocholesterol reductase [Trifolium pratense]	XM_024782669.2	XM_024782669	1177	0	PREDICTED: Medicago truncatula 7-dehydrocholesterol reductase (LOC25491175), mRNA	K00213	DHCR7	7-dehydrocholesterol reductase	http://www.genome.jp/dbget-bin/www_bget?ko:K00213	Q9LDU6	2042	3.2e-287	7-dehydrocholesterol reductase OS=Arabidopsis thaliana OX=3702 GN=DWF5 PE=1 SV=1	PF01222	Ergosterol biosynthesis ERG4/ERG24 family	GO:0016126	sterol biosynthetic process	GO:0016628	oxidoreductase activity, acting on the CH-CH group of donors, NAD or NADP as acceptor	GO:0016020	membrane	KOG1435	Sterol reductase/lamin B receptor
TRINITY_DN11972_c0_g1 (CYP90B50)	40.81	41.81	43.5	49.29	45.94	47.48	84.57	89.47	78.89	37.53	92.39	88.46	2082	A0A517FND3.1		2519	0	RecName: Full=Cholesterol 16,22-dihydroxylase CYP90G4; AltName: Full=Cytochrome P450 CYP90B50; Short=PpCYP90B50 [Trigonella foenum-graecum]||QDS03633.1 cytochrome P450 CYP90B50 [Trigonella foenum-graecum]	MK636707.1	MK636707	1515	0	Trigonella foenum-graecum cytochrome P450 CYP90B50 mRNA, complete cds	K09587	CYP90B, DWF4	steroid 22S-hydroxylase	http://www.genome.jp/dbget-bin/www_bget?ko:K09587	A0A517FND3	2519	0	Cholesterol 16,22-dihydroxylase CYP90G4 OS=Trigonella foenum-graecum OX=78534 GN=CYP90B50 PE=1 SV=1	PF00067	Cytochrome P450	--	--	GO:0004497//GO:0016705//GO:0020037//GO:0005506	monooxygenase activity//oxidoreductase activity, acting on paired donors, with incorporation or reduction of molecular oxygen//heme binding//iron ion binding	--	--	--	--
TRINITY_DN168_c0_g1 (CYP82J17)	100.68	103.17	97.34	108.81	111.65	107.59	75.94	73.23	65.16	54.36	66.25	63.76	2134	A0A517FND1.1		2521	0	RecName: Full=Cytochrome P450 CYP82J17; Short=PpCYP82J17 [Trigonella foenum-graecum]||QDS03635.1 cytochrome P450 CYP82J17 [Trigonella foenum-graecum]	MK636709.1	MK636709	1376	0	Trigonella foenum-graecum cytochrome P450 CYP82J17 mRNA, complete cds	--	--	--	--	A0A517FND1	2521	0	Cytochrome P450 CYP82J17 OS=Trigonella foenum-graecum OX=78534 GN=CYP82J17 PE=1 SV=1	PF07127//PF00067	Late nodulin protein//Cytochrome P450	--	--	GO:0005506//GO:0020037//GO:0046872//GO:0016705//GO:0004497	iron ion binding//heme binding//metal ion binding//oxidoreductase activity, acting on paired donors, with incorporation or reduction of molecular oxygen//monooxygenase activity	--	--	--	--
TRINITY_DN2906_c0_g1 (CYP72A613)	68.06	69.76	65.39	68.7	66.42	64.77	39.03	36.95	36.43	34.83	22.14	28.7	2079	A0A517FNC9.1		2355	0	RecName: Full=Cytochrome P450 CYP72A613; Short=PpCYP72A613 [Trigonella foenum-graecum]||QDS03634.1 cytochrome P450 CYP72A613 [Trigonella foenum-graecum]	XM_024772784.2	XM_024772784	1189	0	PREDICTED: Medicago truncatula 11-oxo-beta-amyrin 30-oxidase-like (LOC11410378), mRNA	K17873	CYP72A	11-oxo-beta-amyrin 30-oxidase	http://www.genome.jp/dbget-bin/www_bget?ko:K17873	A0A517FNC9	2355	0	Cytochrome P450 CYP72A613 OS=Trigonella foenum-graecum OX=78534 GN=CYP72A613 PE=1 SV=1	PF00067	Cytochrome P450	--	--	GO:0020037//GO:0005506//GO:0004497//GO:0016705	heme binding//iron ion binding//monooxygenase activity//oxidoreductase activity, acting on paired donors, with incorporation or reduction of molecular oxygen	--	--	--	--
TRINITY_DN18092_c0_g1 (TfWRKY40)	3.94	6.83	5.46	25.89	25.87	26.64	9.97	12.55	12.79	6.79	9.66	8.67	1078	QDC33364.1		1270	9.02e-175	transcription factor WRKY7 [Medicago sativa]	XM_003588780.4	XM_003588780	598	0	PREDICTED: Medicago truncatula probable WRKY transcription factor 40 (LOC11436565), mRNA	--	--	--	--	Q9SAH7	509	7.45e-61	Probable WRKY transcription factor 40 OS=Arabidopsis thaliana OX=3702 GN=WRKY40 PE=1 SV=1	PF03106//PF06064	WRKY DNA -binding domain//Host-nuclease inhibitor protein Gam	GO:0006355	regulation of DNA-templated transcription	GO:0003700//GO:0043565//GO:0060703	DNA-binding transcription factor activity//sequence-specific DNA binding//deoxyribonuclease inhibitor activity	GO:0005667	transcription regulator complex	--	--

## Sheet: Suppl. Table S3
TfWRKY40
TGCAGGTACACCACCCCCCTCGTTCCAGTTGTCGAGCGCACACAACAAGCACCGAGCAAC
CATTCTGCTGATCAAGGTACGATCAATATACATCCTTAATTACTAGCTTTTGACACATTG
AAGTCTCCACAAAAATCAAACAAAATAACATAATTTATGCGCAATTCACTACATTATACA
TGGCAATTTCACCATTTGGCCTTATTAGAAGTATGGTCCAAAATTCTTCCTGAAATAGCT
GTGGCAAGTGCTGCAGTGAAATTAGGATCATTTGTCAAAGAAGTAGCCATTTGTTGAACC
AAGTCAAGCTTCATGGTTGGACATGTCCTTTGAATAAATTGTTTAGGTGAAGAAACATGA
ACTGAACCTAAAGGAGCTTCTTCACTTTGAGTTGATATCATTGATATTTCAGCTTTCTCA
TGACCATGGTTGTGCTCTCCTTCATATGTTGCAACTAGTATGGTAGGGTCTTCTATACTT
TTTTGCACCTTCTTTTTGACTGGGCAGCTTGGAGCATATGAGCACCTAAAGTAAGCTCTA
GGAGAGGGGTTATCTCTTGTAACCTTTTGACCATATTTCCTCCATTGATATCCATCCATC
ACATATAAGCTATTACTAGATGCTTCTGTCTTCACAAGAACCTTATAAGCCTTAGGTGAG
GAAATATCCCTACATGGCCTTTTGATTAATGATTCTTCTTCATCAGTAACAATGCTGCAC
TCATTATTATTAATAATATTAATGCCTCTAATAGTACCAAACATATTGATGCAATTTTCA
CTCTCAACTTTTCTCTTCCTTGATTGTTGTGTTTGGTGTTCAAAATTTTGGTTCATCAAT
TGGCTCAATTTATTTTGCATAGCCTCATAATTCTCACACATGTTGGTCAATGTTTCACTT
AGCCTCTTGTTCTCACAACTTAGACGATGTAACTCTTCGACCAAAACTTCGTCCTTGAGT
ATAGAAGGAACATTAATGTTAAGGTTGAGTGAAGTATCCACGCATGTTGATTCCATTGCA
ATTTGCTGGTGAAAGAAATTAAAATAGTAGAAGGCAAAGTTGGTGGAGATATATAGTA
ACAT1
CTTGTTTCCATTATTTATTTTGGGTAATCTCAGTTTTAAACACAAATATTCTAGCAAAGC
ACACGAATCTATGTAATCTTGAGTTCAGAATAAGAGGCTTGAATAATTTATTCATGCCAC
AGCAAGGTACACCAGCAACTTATTGCAGAGAAAATGAAAATCTAAATAATGACTACATTG
CTCCTAAAAATGTTCTCATTAACAAGATGTGAGACTTAAATTTGATAACCAAATAGCCAA
ATTTTTCCACTATTTCCTTTTTGTCCTCGTAAACATCTTGAAACCTGCATGCACACTAGA
GAGGCATCGTTGCACATACACTGGCTCTTAAACAACTACCAAATATGAATTACTTTCACA
GGAGCTCCACGACAAGGGCAGATGCACCACCTCCTCCGTTACAAACACCACCAACACCGT
ACTTTCCGTTTTTCTGCTTCAGTACCCCCAAAAGTGTCACCAGAATACGGGCACCACTGC
AACCAAGAGGATGGCCCAATGATACAGCTCCACCATGTACATTTACTTTGCCCGAATCTA
GTCCAAGAAGTTTCTGATTTGCAAGAGCCACGACCGCAAAGGCTTCATTAATTTCATAAA
AATCAATTTTTGAAGTCTCCAACCCTGCATTGGCAATAGCTTTGGGGATGGCAATGGCTG
GAGCTGTTGTAAATAACTCCGGGTCCTGAGCAGCATCAGCATATCCAGTGATTTTTGCAA
TGACCTGAAGCCCAAGCTTCAATGCCTTCTCTCCACTCACCAAAACTAATGCAGCAGCAC
CATCACTTATGCTGGAAGCATTGCCAGCAGTAACAGAACCTCCAGTCTCCTTGAAGCTTG
GTCGGAGTTTGCGTAACTTGGCAGCATCAAACTTTCCTAGGCCCTCGTCCTTGTCAACAA
TTGTTGACGGTCTTCCCCTTCCACCAGAAACTTCAACCGGAGTGATTTCCCACCCAAAGT
AACCATTTTCTTGGGCAGAAATTCCACGTTCAAAACTTTGAACTGCATAATTATCCTGGT
CTTCTCTTGTTATTGAATGGTTATCTGCACACAGTTCAGCGCACACTCCCATACCAACAT
CCTTATAGACATCCCACAAACCATCTTTCAACATCCCATCAACTAGTGAATCATGTCCAA
GGCGGGACCCTTTCCTTGCTTCTGCCAGGTACTTAGGTACACTAGACATGTTCTCCATAC
CACCAGCGACGACAACATCATTTATGCCCAATTGAATACTCTGCGCAGCAAGCATTGTAG
CTTTCATTCCCGATGCACAAACTTTGTTAACAGTAGTGCAGACTACTGATTTGGATAGTC
CTGCTCCGAGAGCAGCTTGTCTAGCAGGAGCTTGCCCCAAATTAGCGCTAAGGACATTCC
CAAAGAATACTTCTTCCACAATTGATGGATCAACATTGGCCCTTTTAAGAGCAGCTTCAA
TAGCTATTGAGCCTAGCTTGGTGGCAGGTACAGATGAAAGAGTACCAAGAAACGCGCCCA
TTGGTGTACGTGCAACACCAACGATGCAAACATCTCTAGGCTGTATAGAGTCGGATGATG
CTGTCGAAGCCATTGATAGATGAAAATTGAATCTTAAGATTAAGATTAAGGTGTTGTTGT
TGTTGTTGAAAGAGGTAACTAAAGAAGAACGAAAGAGAGTGATGAATGAGAAAATGAAGG
AGGGAAGTGTGTAGTACTAAAGAGTGAGTGAAGAAAAATGTGGTGGGTTTGAGTGTTTAA
ATACTGCCATGTGGACAAGCCACGAGTTACACGCACATCAATCCAACTACTTCTCTTGTT
TTCTTTTCTCAAATTTGGG
ACAT2
ATCATATCATAGTGATAGTGCCGTATTTAGCTTTCCAATTCCAACGTTGTATTGTATCTC
TGTAGAAACAAACATATCTCTAATCTCGGACGCTCTCCATGTCTTCAAAATCTCGAGATG
TTTGTATCGTTGGTGTTGCAAGGACACCAATTGGTGGTTTCCTTGGATCACTATCATCTC
TTTCAGCTACACACCTAGGCTCACTCGCTATTAAAGCTGCTCTCAAGAGAGCTAATGTTG
ATCCATCAATTGTGCAAGAAGTGTTTTTTGGGAATGTTCTTAGTGCAAATTTAGGGCAGG
CTCCTGCTAGACAGGCTGCATTAGCTGCTGGAATACCTACATCTGTTATCTGCACTACTA
TTAACAAGGTCTGTTCATCTGGGATGAAAGCTACCATGTTAGCAGCACAAACCATTCAGT
TGGGTTCCAATGATGTTGTTGTCGTTGGTGGTATGGAAAGCATGTCAAATGCGCCTAAGT
ACATTGCAGAATCAAGGAAGGGATCTCGGTTAGGACATGATACTATCATTGATGGTATGC
TCAAAGATGGCCTTTGGGATGTCTATAATGACTTTGGCATGGGAGTTTGTGCAGAAATCT
GTGCAGATCAGCATGCGATAAATAGAGATGAGCAGGACTCTTATGCCATTCAAAGCTTTG
AGAGAGGAATATCTGCACAGAATGGTGGTCATTTTGCTTGGGAGATAGTTCCGGTTGAAA
TTTTCAGTGGACGAGGAAAGCCTTCCACACTAGTTGATAAAGATGAAAGTTTGGGGAAGT
TTGATGCTTCAAAGTTACGGAAGCTTGGACCAAACTTTAAAAAGGTTGGGGGTACTGTGA
CTGCTGGCAATGCTTCTAGCATAAGGTCCCTTCCTCTCTCTCCCTATCTCACCTCATTTT
TGTGTTTCTGTATACATGGTATGTTGTACCAACACATGCATTCTTCGATTCCCATCTGAA
TCCTGTTAGGAAATGCCATAAAGAGAAGATCAACACTAATATTTTTAACGTGAAAAATCC
TCCCAATATGAAAGGAAAATATCAGATCTTATGATCCAAATAAAATGTCTTCACTATGAA
GTAAAATATAAAATGACTTGATTTTCCTAATATACATGAAGACTTTTCTCGACCTCACTC
GTCTAGGGGATGACTTACAATACCTCTCACCAAGACCGATTGAAATATGGAATAAAGCTC
TCTCTTTTGAACTTGATTACAATTTACAAGAACTCTAACCCTCCTGTAGTTCAACTTGCC
TTCTTGCACCAAAATTGAAATAGTGGATGTAATTGTGTCTCATTTCTAAAATGAATACGA
TGGTCTCAAGAGTTAAGGATATTCCAAGACCTCTGAATATTCCCATCAATTAGTTCCCAT
GCATATGGATTATAAAGATCCGTCATTCATAGTGATCCACTATTGTGGAGGGAGTCCCAA
CAAATTCTGTGGGGAGTGTCCTGTATGCGGCAAGAAGTTTCTTTAATAAATTCCTATGCG
TTACAAAATTTGGGGTAAGGTAACCATAAGTTTCTGACTTGCATTCTCTTTTGTTGATCA
TGCCTTGTTTATTGACTTGACTAGTGATGGTGCGGCTGCATTAGTGCTAGTGAGTGCAGA
GAAGGCGCACGAGCTTGGATTGCATGTAATTGCAAAGATAAAAGGATTTGCAGATGCAGC
TCAGGCACCCGAATTATTTACAACTGCTCCTGCCCTGGCAATACCAAAAGCTATATCAAA
TGCTGGTCTTGAGGCTTCTCAAATTGATTATTATGAAATAAATGAAGCCTTTTCAGTTGT
GGCTCTTGCAAATCAGAAGCTTCTCGGTCTTAATCCTGTGAGAGTTCATGTTACTCAGCT
GTTTGTTTCTTTTTGCATAATAACATGTCATTTTTTGGCTGTTCTGGCTGCTTCTGCATT
TTGATCCTCCATTGTGCCCTAGTATAATGGCTTAGCAAATAGACAAGTCATATACTTCCT
ATCAAATGCAGGAAAAACTTAATGTGCATGGAGGAGCTGTGTCATTGGGACATCCATTGG
GTTGCAGTGGAGCTCGCATCTTAGTTACACTACTAGGGGTATTGAGACATAAGGGTGGAA
AGTATGGTGTTGCTGCCATCTGCAACGGGGGAGGAGGTGCATCTGCTCTAGTCATTGAGC
TCATGCAAGGCGCCACTTGGAGACGTTCATCATTGTGAAAAAGATCTTTGAAATGATGAA
GTTTATAGGCCGAGTTAAATGAATAAATGGTATTAGTTCAGCTTCACAACCATCTGTAGT
TATGTCTTTTTGTGAACTATACCTAAAGGTCATCAATGCAGTAGAGAATAAAGAAATAGT
CTAGTCTGAAATCTACTTAGTGTATATTTAGATTGTCGGTGAGTTTAGCTTAATCACGTT
GAGCCACTGTGATTTTGGCTAAAAGCTACACTTCGCATCTTCAATAAAATCACCGTGATT
CCAAACATGTACTTAATCTTTACATTGAATGTGATAACGCTTATAAGTTATGTAGCTGCT
ACAAGAGCTTAACAGGAATATATATTATAACAGAATAACTACCTTTCATCTATAAACTAA
CTACAC
ACAT3
ATTTGCACTAAGAACATTCCCAAAAAACACCTTTTGCACAAGTGATGGCTCAACATTTTC
TCTCTTGAGTGCAGCTGAAAATAGATGGATTTTGGGGTCTCAGTGCTGTAGCGAGGGATA
AGCATGGCGAGATCGTCGCTGCTGCAACTTGGAGAGAACGGGGTGAACAAATAATTGTAG
AAGCGGAAGCCAAAACGATGTTGAATGCTACCAATTTTGCGAGTGATTGTTGTTTATGCC
GGGTGATTATCAAATCAGATTGTGAGGTGAAAGTGAAAAGGGTGAATGCCACTAACTGAT
CACGTACTAGATGGGGTTTTATGGTTCAGCAAGTAAGAGAGAAGAAGCAGAACTTTGAGG
ATATGATTGTTCAACACATTAGAAGAGAAGGAAATGAGGCTGTGCATGTTTTGGCTCAAG
AATCCCATATAGTTTTAGATCAGGTTTGGTTGGAGGAGAATCCACCAGCCATTCTTCACC
AATTGTAC
HMGS1
ACTGTGGGCACCAAGCCATTGGATGTTTATTATTAACATGCAACAAATAATCTAAAAATA
TAAAATTTGACTTCAAAGTAACATCTTAAAGGGTAAAATACAATATTTGAATTTTTTTAC
TCGTACAATATTTGAATTGACAACAATTGCAACTACATAAAACATTTGCCTTCCCTTACA
AAAACTAATGCAAACAAGACTACCCTTCACTCAATGCGGAGCTTAATTCCATTTATTATT
TGTTGCATAGATGCTAACCATCAGTGGCCATTGACAGTCAAACCGTTGATTGCAGGTGTC
GAATTGCTTTCGCTAGTTTTTGTTGCGTAGAATCTACGATACATGGTATCAACTTCGGTG
AGATAGAATGTGCCTGGAGCTAAAAGGCTACTGTCCTTGCTTGTTACATAATCCTTGGCA
CCATACCTATGTTCCATTAGCTTCAGTGTTTCAATAAACTTCTCTGGAGGGAACTCATGT
CTTGACTTCAACTTTTCAGCAACATCCATCACTCGGGCAATGTTTGACAAGCTAAATGGA
TGTTTAGTTTCACGTAATTGCAAGGAAAACATCGTGGCAGTTAAGCCACTTCCATATGAG
AATAATATCACCCTCTTACCTTCCAATGAGCTATTTTTGTTGTGAATAAGGGATGCAAAT
GCTGCATAGATGGATGCGGTGTACATGTTGCCAACTTGCTTTGGTATCAAAGTAGATGGT
TGTACCTTCTCATCGTATAGAGGCTTTGCAACGTGTTGGGATGCCTTTTCAAGATCCCGG
CTTTGATAGCTTTCGTCATCGGATAAAGTTGCAAAAGGTCCAAGCTTTTCTTTGGTAACC
TCATCCTTAGAGCTGGGATTCCTCAAGAAGTCGCTGAAGACCAAACGAGCAAAACTTTTT
TGCACAAGCTTGTTATAAGGAGAGTGGAATACAAAGTAGTCAGCATCAGAAAGAGAAAAT
TGTTTTCCTTCGTGTTTCTCATATTTGTGACAGAAATTTTTAAAGCAGGTATCAAGAGCC
ATGAGGTAACATGTTTGTGAAAGCTTTCCATCGACAACCGGATATTCACTAGGAAGGTCA
GGTTTGTAAAAGTCATAAACATGAGCCATATGACTTCCCCTCAATTTGCTTTCAAAAGAA
ATAGGGGCATCAGGACCAATTAGCATGGCAATAGCAGCAGCTCCTCCGGTAGGTCGAGCA
GGACCTTCAGCATAGACTGCACTGTCGGTGCAGACAACAAGTCCATAGCGTCCATCCCAT
GAATTGCTCTCCACCCAATTGACACAATTGAACAAAGCGGCAGTTCCTCCATAGCATGCA
TTACTTGAGTCAACACCTTCAATGTCAGTATTTCCATATTTCTCAAAGATCTGCATCAAG
AATGTCTTGATGGATTTGCTTTTGTCAATCACAGTCTCACTGCCTACTTCAAGACGACCA
ATTTGTTTAGGATCAATCTCATACTTCTCAAGAAGGTTGGTAACCACTGTCAAACTCATT
GAGATGACATCTTCAACATCAGAACAAAATGACATGCAATCTTGTCCAAGTCCAATTGTA
TATTTCCCTTTACTCGCACCATCATGAGCTTCCAACGCTTCCTGTTGAACGCAATTAGGA
GGGAAATAGATATCAAGAGCGAGAATTCCAACGTTCTTTGCTGCTGCTGCCATTTCTTGA
TTGGTTACAGAGAAAAAAAATCGAAATCAAAAGCTTCTCTTGTTGGAAGGAAGAAGAGAG
AGTTGAATTTCGCTGGATGAAAGAGTTTGTTTGTTAATCACATGGAAATGTTTGGAAAC
HMGS2
TTATCTTTATAAACAATAACTAGAATAAATAGCCATAAGCCATCAAATACAGATGGTTAA
CCAGAACAAACTATTTTTCTAAAATTTTAACTCTTAATTTGAATAATATCAGCTATCATC
TTCAATCGAACTGTCACGTGCTCATCGTAGCGTCTTTCTTAGCGTAAAATCTCCTATACA
TGGAGTCAACTTTGGTGAGATAGAATGTGCCCGGAAGTAAGTAGTTACAGTCTTGGCCAG
TAACAAAGTCCTTTCCACCATAATGGTGCTCCATGATTTTCGTGTTTTCGACAAATTTTT
CAGGAGGTAACTCAACCCTCTGCTTCAACTTGCCAGAAACATTCATCACCATCACAATGT
TCGACAAATTAAATGGATGTTGACATTCTTGAAGGCGGAAGGAGAACATCGTAGCGGTTA
AGCCACTTCCATATGAGAACATGATTACCCTTTTACCTACCAGCGAGTCATGCTTATTGT
GAAGGAGAGATGCAAATGCTGCATATAGAGATGCAGTGTACATGTTCCCAACTTGCTTTG
GGATTAATGTGCTCGGCTGAACCTTCGCGTCATATGTTTTTTTTGCAGCTTGCTGATTTG
CCTTTTCAAGATCACGACTTTGATAGCTCTCATCGCCGTTTAAGGATGCATAAGGTGCTA
GAGCTTGCCTGGAAACTTCATCAACAAAACTTGGATTTCTAAGGAAGTCATTGAAGTATA
ACCGACCAAAACTTTTTTGCACAAGCTTGTTATATGGAGAATGAAAAACAAAATAATCAG
AGTCTGCCATTGAAAAAGGCCTCCCCTGCAATTTTTCAAATTTTTCACAAAGTACCCGAT
AGCAGGAATCGAGTGCCATGAGATAACAGGTCTGTGAGAGTTTTCCATCAACAACCGGGT
ATTCACTCGCAAGATTTGGCTTGTAAAAATCATAGGCATGAGACATGTGACTTCCCCTGA
GTTTGCTTTCGAAAGCAATAGGAGCATCTGGCCCTACAAGCATTGCAATTGCAGCTGCTC
CCCCAGTAGGACGAGCAGGTCCTTCGGCATATACCGCACTGTCTGTACATACGACGAGTC
CGTAACGTCCATCCCATGAACTACTCTCCACCCAATTCACGCAATTGAACAAAGCTGCTG
TTCCACCATAGCAAGCGTTTGTTGAATCAACACCTTCAATATCAGTATTACCGCTGTCCT
CAAAAACTTGCATCAGGAAGGTCTTAATGGATTTGCTTTTGTCAATGACAGTTTCACTTC
CTACCTCCAAACGACCGATTTTCTTTGGATCAATGTTATATTTTTCAAGAAGTGAACTAA
CAACAGTCATGCTCATTGAGATAACATCTTCAACCTCAGTACAAAATGCCATACAATCTT
GTCCCAGTCCAATAGTGTATTTCCCTTTGCTCACACCATCATGAGCCTCCAAAGCTTCCT
GTTGAACACAAGTGGGAGGGAAATAGATATCAATAGCGAGAATTCCAACATTGTTGGGGT
GTGAAGAAGCCATGTTTGTGTTGTGTTGTGTTGTGTTGATGTGTGTGTTTTCTTCTTAAG
ATGTTTTTTTTTCACTTCACCAAATGTTTCTGTTGTGTTTGTATTGATGTGTGTGTGTGT
GTTTTTTTTTCTTCTTAAGATGTTTTTCTTTTTCACTTCACCAAATGTTTGTGATGTGTC
GATGTGTGTGTGTGGTGAATGAATTTGGAAGAAGCAACAATGTTTCCTTTCAACTAACCC
CTTTTTTTAGGGGAAATTTTAAAGGGTTTGTTTGAATTG
HMGR1
ATGGGTCCAGAGGCAGCGCAGCAACTTCGCTGTCTCAAACACTATAACCATTCATTTCCA
TTCTTTCAATCTGCCCATTCTCTCCCTCTCTCTCTCCACCCTTCTTTCTCTCTCTAAACC
AATGGACCTCCATCGCCGGCCGCCTCCCACCACCGGCGCCGTCGCTACCAACCCTCATTC
CCACCGTCTCAAATCACCTTCCCCAACACCAAAAGCTTCCGATGCTCTCCCTCTCCCTCT
CTACCTCACCAACACCATCTTCTTCACCCTCTTCTTCTCCGTCGCCTACTATCTCCTCCA
CCGCTGGCGCGACAAGATCCGTAGCTCCACACCTCTCCACGTCGTCAATTTCTCCGAACT
CGCCGCCATTGTTTCCCTCATCGCTTCCTTCATCTACCTTCTAGGTTTCTTCGGTATCGA
TTTCGTTCAATCCTTCGCAACACGCGCTTCTCAAGACGGTTGGGACCTCGACGACACTGT
CATATCCACCACCACCACCACAACCACCACTAATAATCATTCTCTCCCTAAACTCACCTC
ACCAGAACCCTCACTCTGTTCAGAGGAAGATAATTCAATCATAAACTCCGTTGTAGAAGG
TATCACACCTTCCTACGCACTTGAATCTCGGCTCGGAGATTGTTTCCGAGCCGCTTCAAT
TCGTCGTGAAGCCTTACAACGAACATCAGGAAGATCTTTAGAAGGTTTACCATTAGAAGG
ATTTGATTACGAAGCGATTTTAGGGCAGTGTTGTGAAATGCCGGTAGGGTATATTCAAAT
TCCGGTGGGTGTAGCGGGTCCGTTGTTGTTAGATGGATTTGAATATACGGTTCCAATGGC
TACTACAGAAGGGTGTTTGGTTGCTAGTACTAATAGAGGATGTAAAGCTATTTATGCTTC
TGGTGGTGCTGATAGTGTTGTTTTGAGAGATGCCATGTCTAGAGCACCTGTTGTTAGATT
TTCTACTGCTAAAAGAGCTTCTCAGTTGAAATTCTTCTTGGAGGATCCGTTGAATTCTGA
TACCTTGTCTGTTGTTTTCAACAGGTCGAGTAGATTTGGCAGACTGCAAGGTATTCAGTG
TGCTATGGCTGGGAAGAATGTTTATATGAGATTTACATGCAGCACAGGTGATGCCATGGG
GATGAACATGGTCTCCAAAGGGGTGCAGAATGTTCTTGATTTCCTTCAAAATGATTTCCC
TGACATGGATGTTATTGGCATATCTGGAAATTATTGTTCGGACAAGAAACCTGCCGCAGT
TAATTGGATTGAGGGACGTGGGAAATCAGTTGTTTGTGAAGCAATTATCAAAGAAGATGT
GGTGAAGAAGGTATTGAAGACCAGTGTGGCTTCCCTGGTGGAGCTCAACATGCTCAAGAA
CCTAGCTGGTTCTGCTGTTGCTGGCGCTCTTGGTGGATTTAATGCCCATGCTAGCAACAT
TGTTTCTGCCATTTTTATAGCCACAGGTCAAGATCCAGCTCAAAATGTTGAAAGTTCCCA
TTGCATAACAATGATGGAAGCCGTAAATGATGGGAGAGACCTCCATATCTCAGTGACCAT
GCCTTCCATTGAGGTGGGTACAGTAGGTGGTGGGACACAACTTCCATCTCAATCTGCTTG
CTTGAATATGCTTGGTGTGAAGGGTGCAAGCAAGGAGGAACCAGGATCAAACTCGAGACT
CTTGGCAACCATTGTTGCTGGAGCTGTTTTAGCTGGCGAGCTGTCTCTGATGTCTGCCAT
TGCTGCAGGGCAGCTAGTCAACAGCCACATGAAATACAACAGATCAAGCAAAGATATAAC
TAAAATCTCATCTTGCGGGTGAGGCCTTGGTTGCAGTCATTGTTTATGGTGTCTAAAATA
AAATACAATAGTCTTTTTCAGCGCAGAAACCGGAATTTAGGGAAGGAAAATTGAAGACAT
TGGATTCAATTTGATTGTTGGTACCCATATCTGGCTCTATGTTCTTATGTGTAATATTTT
GACAGTACCTGTTTGGTTGTCCTCTCCGGACACTCCTTACAGCCGAGCCATTGGTTGGGT
GTTAACATTCGCCTTTTCCTTAATCAAGACATTGAAGTGTTGTATTATATTCATTTCCTG
ATATTTATATTTAGTATATATGTATCAATGTACTATTATTGTCTCTTATACATTTGTTCT
ATGTAATTGTGGACCAGTTAGTTAGCCGTGTGGTTTGATGAATTTCCTTTTGTTGTACTT
GTCCACTTAGTAGTAGTACCCCTGAAATGAATTTGACCATGTCTTTCCTATGATTTCTCA
TTTAGTGTGGATGTTGATGTTGTTACTATTCTGTTGTTGTTTTCATTTACTGTTTCAACC
C
HMGR2
ATCATCTCTTAAACTATTTTTTTCTTTCTTTCTTTCTCTCCATTTTCTATTTTTAGAATT
CAAACTTTCAAAAATCCTTCACCGGAGAAAAATGGACGTTCACCGGAAAAGTGTAAACGC
CGTCGAACTTTCCGTCAAAAGTTCAAAAACGAAGCATGATTCACAGTCACAACCTTCACT
GTACTTAACAAACGCGGTTTTCTTCGGAGTCTTCTTCTCCGTCGCGTATTTTCTTCTTCA
CCGGTGGCGTGAGAAGATCCGAACCTCCACACCTCTTCACGTCCTCACAATCTCCGAGAT
TGTCGCCATCGTTTCCCTCGTCGCTTCCGTTATCTACCTCATGGCTTTCTTCGGCATTGG
CTTCATTCTTCATCCTTTCGCCGCTTCTCGTGCTGTTCATTACGATGAAGAAGATGAATC
CGAAATTGCAAAAAACTCCGGTTTATGCCTCGCCGGAGTCTCACCGCCGAAAATCGCCGT
TGAAAATTTTTCTCCGGCGACTTCGCCGGCACCGGTGCTACTTTCAATGGAAGACGAGGA
GGTAGTCCGTGCGGTGGTGACAGGATCAATTCCGTCATACTCACTTGAATCAAAACTCAG
AGATTGCAAACGTGCGGCGGCGATACGTAACCAAGCGGTGGAGAGAGTAAGTGGAAAGTC
ACTTTCAGGTTTACCGATGGAAGGTTTTGATTATGATTCGATATTAGGACAGTGTTGTGA
GATGCCAATAGGATTTGTTCAGATTCCGGTGGGAGTTGCCGGACCTTTGTTGCTCGACGG
GAAGGAGTACACTGTGCCGATGGCAACCACTGAAGGTTGTTTGGTTGCAAGTACTAATAG
AGGATGTAAAGCTATTTATGTTTCCGGTGGTGCTTTCGCCGTTGTCCTCCGTGATGGCAT
GACTAGAGCTCCAGTTGTTAGATTCAACTCCGCCAAAAGAGCTTCTCAGTTGAAGTTCTT
TTTAGAAGATCCTCAAAATTTTGATTCCCTCTCTCACACTTTCAACAAATCAAGTAGATT
TGCAAGATTACAAAGTATTAAAGCTACAATGGCAGGAAAGAATTTATACGTTAGATTTAC
TTGTTCAACCGGTGATGCAATGGGGATGAATATGGTATCAAAAGGTGTACAAAACGTACT
TGAGTTTCTTCAAAGCGATTTTCCTGATATGGATGTTATTGGTATATCTGGAAATTTTTG
TTCGGACAAGAAAGCTGCGGCGGTGAATTGGATTGAAGGGAGAGGGAAATCTGTGGTGTG
TGAAGCTGTAATTAAGGAAGAGGTGGTGAAGAAAGTGTTGAAGACTAGTGTGGAGTCTTT
GGTTGAGCTTAACATGCTCAAAAACCTTACTGGTTCAGCCATGGCTGGTGCTCTTGGTGG
ATTCAATGCACATGCTAGTAATATTGTTTCTGCTATTTACTTGGCTACAGGTCAAGATCC
TGCACAAAATGTTGAAAGTTCTCACTGTATGACCATGATGGAAGCTGTGAATGGTGGGAA
GGACCTTCATATCTCTGTTACTATGCCTTCCATTGAGGTGGGTACAGTTGGAGGGGGCAC
TCAGCTTGCATCACAATCAGCTTGTTTGAATTTACTTGGTGTTAAGGGTGCTAGTAAAGA
GACACCAGGGGCAAATTCTAGACAATTGGCAACTATAGTAGCCGGTTCGGTTCTTGCAGG
AGAGCTCTCACTCATGTCTGCAATTGCAGCTGGGCAGCTTGTGAAGAGTCACATGAAATA
CAACAGATCTAGTAAAGATGTCACCAAAATTGCTTCATGAGGTGGCCATATGACAAAACC
ACAACTGTGAGATGAATAACCTTTGGATACCATCAAGAATGAAAGAAAAAGAAAGTTCAA
TGTATGAGTATAAATTACTATTTCGCAAATGACATTTATTGGTGGTGTTGGTGGGGACTT
AGCCTGCAAAACTAGACTTCATTAATGTATGGTCCATGTGAGGGGATCGTATCTCTCTGA
AGTTGTACAGAACGAATTAAATAAATTCACCTTTTTTTTAAAGAATAAAAGGTTCATTAG
TGTTGTAAGTATGTCTCAAGTCATCTTAAGCTCAAATGATATGGTAC
HMGR3
GTCGTATAAATTGGGATGGGAAATATGTTGGTACATAAAAGGATCAAGATTAAAATAGAT
TAAGTAAAACCGGCACAGGAATATCCCTTAAAACTCCCTTTGTCCAGGAATCTCTACGAA
AAATAATTTGGAAATGCCAATGCCGACATCTAAAGTATTTGCAAGGTGTCAATCACCAAA
AGACAAGAATTGAAAAGAGTTGAGTGACGACCAACTAGAGACTATTATTAACTCTACATC
CCATTGATGTCTCAGCTCATGCTAAAATTACAAATTAACCAGAAGTTGGAGATTACAACA
CATCAAAATACTCCACACACACACACTATAATAACAAATTTTTGAGGCAATAACTTCCGA
CAAGAGAACGACACAATACAGAATAAATTAAAACAAAAACAAAAAGAATCAAACTAATGC
CAAAGGTTTAGCTACTTGTTTTCTCCATCTTCTGATTCAACCCTTATGTACAATCTCATA
AAAGACAATGCCTCTCACATGGACTACGGTGTTCAATACCACTAGATGCAAGCTATTCTT
ATTTTGTTCTTACCACATGCTCTTGTTGAGCTGAAAAAGATGCTGATCATCATTTTTTTA
TTCACCCCCGGGCCACCACCAATAGTCCTTTTGAAAACCAACTATAAGCTCTTTTTGGTC
GTTTTTGTCGTTATCAGAGGCATTGGTCCCCTCTACAAGTTTATTGTTGTGTTGTGTGAG
GCCAGCTCACGAGACGATTTTAGAAATATCTCTGCTAGATCTATTGTATTTCATGTGACT
CTTAACTAGTTGGCCAGCTGCAATTGCAGACATGAGTGATAACTCGCCGGCGAGAACTGA
ACCGGCGACAATGGTGGCCAGTAGTCTAGAATTTGCACCTGGAGATTCTTTGCTGGCACC
CTTAACACCGAGTAAATTAAGACAAGCTGACTGAGATGCGAGTTGTGTTCCCCCTCCCAC
GGTACCAACCTCAATGGAAGGCATGGTGACAGAAATGTGAAGGTCCTTGCCATCATTCAC
AGGTTCCATCATGGTAATACAGTGAGAACTTTCCACATTCTGAGCAGGATCTTGACCAGT
GGCTATGTAGATAGCAGAGACAATATTGCTAGCATGAGCATTGAACCCACCAAGAGCACC
AGCAATGGCTGATCCCGTTAGGTTCTTAAGCATGTTAAGCTCAACCAACGCCGCCACATT
GGTCTTCAACACTTTCTTCACAACTTCTTCCTTAATTACAGCCTCACACACCACAGACTT
ACCACGCCCTTCAATCCAGTTAACAGCTGCCGCTTTCTTGTCAGAACAGAAATTTCCAGA
GATTCCAATGACATCCATGTCGGGGAAGTCACTCTGAAGAAAATCAAGGACATTTTGAAC
ACCTTTTGATACCATATTCATCCCCATGGCATCACCTGTACTGCAACGAAATCTAATGTA
CAAATTTTTGCCAGCAATAGTAGGCTGAATGCTCTGCAATCTAGCAAATCTGCTTGACTT
GTTGAAAGTGACAGAAAGTGCATCAAAATTAATCGGATCTTCCAAGAAAAACTTCAACTG
AGAAGCTCTTTTCGCCGACGAAAACCTAACAACAGGTGCTCTAGTCATTCCATCTCTAAG
CAAAACAGAAGAAGCTCCACCACAAGCATAAATAGCTTTACACCCTCTATTGGTACTTGC
AACCAAACAACCCTCCGTTGTAGCCATTGGTACAGTGTACTCAACTCCATCCAACAACAG
TGGACCCGCAACTCCAACCGGAATTTGAACAAACCCTATTGGCATCTCACAGCACTGTCC
TAATATCGAATCGTAATCGAAACCTTCCAACGGTAAACCTTCCAATGATTTTGCAGTTAT
CATCTCAACCGCCGAACGACGAATCGCCGCCGCTTTCCGGCAATCTGCGAGTTTAGATTC
TAGTGAATACGACGGAATTGAACCGGAAACCACTGATTTCACGGTTTCCTCGTCTTCCGG
TGAGAGGCTTACCGGTTCAGCAACAACGTAGATCTTCGCCGGAGCTACAACTGGCGGAAC
CGGTTTAGCATCGGTTTCGACAAGTGCGGCGGGACACGGTCCTGGTTTTCGAGAGTCTTC
TTTCGCGAGAATCTCTTCATCGGAGAGATCGTCCGGGAAGGAAGTACGAGATCCGATACC
GAAGAAACCTAGAAGGTAAACGGCGGAGGCGATTAGAGAAATGATGGCGGCGGTTTCGGA
GGCGGTGACGACGTGAAGAGGAGTTGAGGTACGGATTTTCTCACGCCAACGGTGGAGGAG
AAAATACGCGACGGAGAAGAATAAACCGAAGAAAACAGCGTTAGTGACGCAGAGAGAAAC
GGTCTGTGTGTGTTCTCCGGCGGTGGTGGTGGTAAGTTTCTGGGTTTTGAGGTGTTTTCC
GGCGGGTAGAGATTGTGGTCTCCGGCGAACGTCCATTTTTTCCGACGAGTTCTGAATCTA
CGAAAATGCGCGCAGATACAAAAAACGAAGGGAAAAATGGATGGACGGAAAAACCCTGAC
GCGAAAAACCAGGGATTTTGGGAGAGAGAAAGGGTATGAATGTCTTTGTCTAGTTTGTTG
GAAAATGAGAGGGAGGGAGAAAAAATTGGAGGATGAACGAGTAGAAAAAATTGGATAATT
GTAACAGTTGTATATAATGGAAAGAGTTTGGAATAAAAAAATGAAATTGTACTAGTTTGC
GCGCTCTTTC
MVK1
CAGAAAGTGCAGATTTTTCTCTGGAACTTTAGCATAAAGTGCAGATTCTTCTCCAAAATG
CTAGACAGAGCAGTATCCAGTGTTCTTCAAAAGAGAAGGTGAAAAGGCATCTAGCACACG
CAATCGGATAACCTCCATTGTATACAAAGGGTGCAGATCCTCTGTGTTGCTGAAGATCGG
AAGGTGAAAAGGTTCCCTATAATGCTCTTGCCAAAAGAGAAACTAGTGGACACAATTGCA
GCAAGTTCTAAGGCTTCTAGACTGATCCTGTATATATGAAGGTTCTTTTTGTTTACTATA
AATATAAACTATTCCCCAATTTGATATGCTGATTTTGCATGTGATGAAATTTAGTTTTGA
TTTCCCCAATTCGATATGCTAATTTTACATAGTATAAATTGGTAATACCAAAATTGTTTC
CATGTGTTTGTTGATGTGATATACTTTGAGTCAAGTCAGGTCTCTATTGTTCAATTAAGG
GATGATCTTTTGTCACTATTAGTTGCTGGTCATGAGACCGCTGGTTCGAGTTGACTTGGA
CACTTCGTCTTCTAAGTAAGGTTACCTGGTTAATACTTGATGTGAAGGGCACAACATGCA
ACCAACGGCTACGATTAGAAAGGGCTAGTGACGCTGATGACACACATAGTTTACGTGTTG
AATTCAGATCAGAAAAAGGAACTCTCTGTAAATGGATCTCAAGGTTTGATGCATGGCCTT
ATGTTGAAACTTATGCAGAGAGTACTTGTTGGGATGCTTGTTTCGGTTGATTGGCACCTC
TTAGCCCCAAAGGACCACAATACACATGAGATATCTATACCGATTAAACAATATGTATAC
TATTAGCCTTCAGAAGAGCAGGCAACACTAGAAGCAAACCATAGATGACACTGAAAGAAC
TTGATTTAAGAAATAAATGGGCTTATGAAGGTGAGAACATCATCCATGGAAAGCCCTCTG
GAATTGACAACATGGTCAGTGCATATGGTAGTATGAAACAGCTTCAAGTTGGATTTATTG
CTTTTCAAGTTAAATGTCCTTTATTTTTCCTACATAGTTGTTGTTCTTGACAAATTGGAT
TGTGGTTCTAATATGAAGAATTTTATGTGTAAGCTC
MVK2
CGCATTCCACATGGACTGTGAAATAGAACAAACAAGATGGATAACGAACAACAAACACAT
AAACACGACGTCGTTTTCGATCGCGCCAATTATCGGAGTAATCAATGGCTAGCGAAAGAG
ACTATTATATATAGTTAGATTAGATCAGAAAATAAATCAATCAATCATTCAATGGAGGTT
AAATCCAGAGCTCCCGGAAAAATCATTTTAGCCGGAGAACACGCCGTAGTTCACGGATCA
ACCGCCGTTGCTTCTTCTATTGACTTATACACTTACGTTTCTCTCCGCTTCTCCACTCCT
TCTTCCGAGAATGAAGAATCGTTGAGACTTGTTCTGAAGGATACTGCATTGGAATTTTCG
TGGCCGATAAGTAGAATAAAAGAAGCTTTTCCTGAATCTGTTTCTTTGTTATCTTCAACG
CCTTCTTCTTGTTCTGTTGAGTGTGCTAAATCAATTGCTGCTTTAGTTGAACAACTTAAT
ATACCTGAAGCTAAAATTGGACTTGCTTCTGGTGTTGCTGCTTTTCTTTGGTTATACTCA
TCCATTCAAGGATTTAAGCCTGCTACTGTGGTTATTACTTCTGAACTTCCTTTGGGTTCG
GGTTTGGGTTCATCGGCGGCGTTCTGTGTGGCGCTGGCAGCTGCTCTGCTTGCTGTCACT
GATTCTGTTTCTGTGGATGTGATCCAGCAAGGGTGGCATTCTTTTGGGGAGAAGGAACTT
GATTTGGTTAATAAATGGGCTTTTGAGGGTGAGAAGATCATTCATGGAAAGCCATCTGGA
ATTGACAACACAGTTAGTGCATATGGTAACATAATCAGCTTCAAGTCTGGTAACTTGACA
CGGATGAAGTCCAATGTGTCCCTTAAAATGCTCATTACCAACACGAAAGTAGGTAGAAAC
ACAAAAGCATTGGTGGCTGGTGTTTCTGAGAGAATGCTGAGGCATCCAGATGCCATGGCT
TTTGTGTTTACTGCAGTTGATTCTATCAGTAAAGAATTGACTACCATTCTCCAGTCACCT
ACACCGGATGAGCTCTCTGTTACCGCGTTAGAAGGGAAGGTAGAAGAGCTAATGGAAATG
AATCAAGGTCTGCTCCAGAGTATGGGGGTCAGTCATGTCACAATTGAAACTGTTCTTCGA
ACAACGTTGAAGTACAAGTTAGTTTCTAAGTTGACAGGAGCTGGTGGTGGGGGATGTGTT
CTGACACTGCTTCCAACTTTGCTATCGGCCACCGTTGTTGATAAAGTGATTGCTGAACTG
GAGTCAAACGGGTTCCAATGTTTCACTGCCGGAATTGGCGGGAATGGTGTTGAAATTAGT
TTTGAGCATTCATCTTGATGTCTATTCTTTATTTTTCCTAGGAGTGAAGTCAATGATCCC
AAAATCAATAAACAGTATGGAAGTATATGTATCTCTTTTTAACATCCTTGTGCATCTTTA
AAATTTGAGACACGCCAATGTAATCTGTTAGCTCACACTCTTGTAGGTAGAAGCTTTTGC
TCAGTTGTTTGTTTACTTCCCATTCCTGATTGTATTCTTCATCTTATTGAAAGTGAAATT
CAATACTCTCTTTACAGACAAAAAGGAAAATCCTTCCTTGTGCAATAATCTGTAACGTTC
TCTCTTTTTAAAGTACTTGTAATTTCTTTTTCCCATTCAATCTTGAACGGAAATTAGAGG
ATATAATTTTCAGATATGAATACGGATCATTGGTTGTCAATCAATGGAACCATTCTGGAA
CGTAAAATTCATACACACTCTTGCATTGCTCATAAGATTCACCATCCATTACATTAACTT
TCTTGAAGCTCTAATGGTCTAGCTCATTTTTATCCTCACCAACTTGATATTTATGTTGTT
CCAGTTTCATCACTTAACTTAGGAATGTTCCCCTCAAATTCACCCTACCATTTCACAGAG
AATATGAGCATGCCAGGTGGTGATGAGTGGCAGAAGGAGGTGTTGACGTGTGCTATTGAT
GGCATGAGGCAGAGACACATCTGTAGAAAAAGGGCATTCTGGAAACCAAACTCAGAGAGT
TTGAGTTTGAGTTGGTTTTGGTCCTTTTGGATATGGCTATGCAACATCAATCAGATGCAT
ATTCTTGAACAACTAGAACTCTTTGGTAACATTTCGTTAGCTAATTGTTAAATTTAACTA
ACCATTTTATTTAATTATGGATTTAATA
PMK1
GGAAGAAAGCCATACGGAAGAGAGAAGAAAGAACTCGTACCGGAAAGACATGCTTGTGAA
CGGTGAGAAACAAAGATGCGACGGAATGGAAATTAACGTGAAGAAGAGAGTGACCCGTCT
GTAGATCTAGCGACGGAGTTAGCAGTAGGTTGTGGATCTCCGGCGACGAGATCTCGTTTC
CGGTGAAACAAAACGGTGGTGATAGTGGTTACCGACGGCGGACCTTCTTCTTTCTCTTCT
TCATTCTTTCTTTTCTCTGTTTATCTTTGTGTTACCGTGATTGTTGTTGTTTTGGACTCT
TTGGTTTGGATCCGTTAATGGTGTTGACAGGTATCGATTTGTGGTAATTGGAGGAAATTA
TGGTGGTCGCCGGAAGTTATGAACTCCGGTGAGGTTAAGTTAGATCTAGGTGAAACGGTG
GTGTTTTTGGCTATTGTGAGTTCGAATCGGTGATGAGGATGAGGAGAGGATTCCAGATCT
GTAAAAATTGAGGGGTTTGGTGCCGGAATAGTGATTCCGGTGGTGGTGGAGGGTGGTTCG
TGGTGGTCGGAGTTGCAGCTCCGGTGGAGAGGAGAGAAGGGACAAATATTGACTTTTTTT
GACCTTTTTTGAAAGTTGTGCAGAAT
PMK2
TGATGCTACATATACAGAAATGAACTGAACTAGTATATTATTGACCGCTTCAGATTTAAG
AATAAACCAACAACAAGGTGAAGAAAGATCACAATTATCAATGGCCGTGGTTGCTTCTGC
TCCTGGAAAGGTGTTAATCACCGGTGGTTACCTTGTTTTGGAGAGACCAAACGCAGGACT
TGTTCTTAGTACTAATGCTCGTTTTTATGCTATTGTTAAACCCATCTACCCTCAAACTAA
ACCTGATTCCTGGGCTTGGGGTTGGACTGATGTCAGATTAACCTCTCCTCAACTTTCCAG
AGAAGCCTTATACAAATTAGCACTCAAAAATCTCACCATCCAAACTGTTTCCTCAAGTGA
AACAAGGAACCCTTTTGTGGAATATGCAGTGCAATACTCTGTCGCTGCTGCTTATGCAAC
GGCTGACCAGAATAAAAAGGACTTGTTACACAAACTACTTTTACAAGGTCTTGACATTAC
AATTTTGGGTTCCAATGATTTTTATTCTTATAGGAATGAGATTGAGAGGTGCGGACTTCC
TTTGACACCAGAATCATTGGCCACCCTTCCACATTTTGCCTCCATTTCCTTCAATACCGA
TGATGTTAATGAAGGAAATTGTAAGCCTGAAGTTGCCAAAACTGGTTTGGGCTCTTCTGC
AGCAATGACAACAGCTGTAGTTGCTGCTTTACTTCATTTCCTTGGTGTCGTAAAGATTTC
CTCTTCAAAAGATCGTAAGGAGAGGAAGGATATTGCAGATCTTGATATGGTTCATAAAAT
AGCTCAAACTGCACACTGTATTGCACAAGGGAAAGTGGGTAGTGGGTTTGATGTAAGTTC
AGCTGTGTATGGCAGTCACCGCTATGTGCGGTTTTCACCTGAAGTGATTTCTTCCACTCA
GGTTGCAGCTACAGTAGTGCCCTTGCCAGAAGTAATCAATGACATTTTAAAAGGAAATTG
GGACCATGACAGGACTGAGTTCTCTTTACCACCTTTGATGACTCTTGTACTGGGAGAACC
TGGAACTGGTGGATCATCCACACCATCAATGGTTGGTGCTGTCAAAAAATGGCAAAAGTC
TGACCCTCAGAAATCTCTGGAAACATGGAGAAGATTGTCAGAGGCAAATTCAGCATTGGA
AATGCAACTGAACTTGTTAAGAAAATTAGCAAAAGAACAATGGGATGCGTATAAATCTGT
GATTAATAGCTGCAGCATCCTCAGATCAGACAAGTGGATAGAACAAGCTTCTGACCCTAA
CAAGGAAGCGGTTATTAAAGCACTGCTCGGCTCCAAAGAAGCAATGGTGGGGATCAGATA
TCATATGCGCCTAATGGGTGAGGCTGCAGGTGTTCCGATTGAACCAGAATCACAAACACA
TCTTCTAGATGCTACAATGAACTTGGAAGGGGTATTGTTAGCTGGAGTTCCAGGAGCAGG
AGGATTTGATGCAGTCTTCGCTGTTACTTTGGGAGATTCGAACAGCAACGTGACGAAAAC
ATGGAATTCACTTAATGTTCTTGCCATGTTGGTTAAAGAAGATCCTTGTGGAGTTTCATT
AGAAATTGCTGACCCAAGAACCAATGAAATCACATCAGCTGTGTCTTCTATTCATATAGA
TTAAGTTTATTTCCATCAATAAAATAAGTCACCACAAAAATATTCTGTGGAATGTAGCTT
TTAGACTAGGCATTGGTTTCTTTTTAGGGAAAAAATGAGTGATTTATTTATTTACGTCCA
TCCAATAGTGCTTAGGTTTCTAAATGAGCAGGAAATTCTTTGAATAGCAAAGTGTATCAT
CAAAATTTCAAATGTGCTGTCCCAAGATATTTTTTTTTTCCCCTTAC
MVD
GAAGCTCACAATAATAGAATAGGGTGGTGGTGGGTGCTGCCAAGTTAATACAGTAGTAAA
TAATAATAATTTTTTCTTCCATTACCATAAAATACCAAATCCCAATATAAATACGCTTCT
TCTTTCTCCTTCTTCACTTCATTTTCACAACAATCGAATTAACGCTCAATTAGATCAGAG
ATCTGATCTTGTCCCTTTCTTCTTCTTCATCTTCAGTTTCACTCTCATTTCTGTGGAATT
TGAAATTACTTCGATTGATTAGTTGGAAATGGCGAGTGAGTCGCAGAACTGGGTACTCAT
GGTTACTGCTCAGACTCCAACTAACATTGCTGTAATCAAGTATTGGGGTAAGAGAGATGA
AACCCTAATTTTACCCGTTAATGATAGTATCAGTGTCACTCTTGATCCCAATCATCTTTG
CACAACCACCACCGTTTCTGTTAGTCCTTCCTTTCAACAAGATCGTATGTGGCTCAATGG
CAAGGAGATTTCTCTTTCTGGGGGTAGATTCCAAAGCTGTTTAAGGGAGATCCGTGCTCG
CGCTTGTGATGTTGAGGATAATAAAAAGGGTGTTAAGATCACCAAGGAGGATTGGAGCAA
ATTGCACGTACATATTGCTTCCTACAACAACTTCCCCACTGCAGCTGGACTAGCTTCATC
AGCTGCAGGTTTCGCTTGTCTTGTTTATGCCCTGGGGAAGCTAATGAATGTCAAAGAAGA
CGAAAGTCAGCTGTCTGCTATTGCAAGGCAAGGATCAGGTAGTGCTTGTCGCAGCTTATT
TGGGGGATTTGTGAAGTGGATAATGGGAAAAGAGAAGAATGGAAGTGATAGTCTTGCAGT
TCAACTTGCTGATGAAAAACATTGGGATGAACTTGTTATAGTTATTGCCGTGGTTAGCTC
TCGGCAAAAGGAAACTAGCAGCACCTCAGGAATGCGTGAGAGTGTTGAAACAAGTTTGCT
TTTAAAGCATAGAGCAAAGGAAGTAGTGCCAAAGAGGATACTGCAAATGGAAGAAGCCAT
TAAAAACCGTGATTTTGCATCTTTTTCACAACTCACCTGTACCGATAGCAACCAGTTTCA
TGCAGTCTGTCTGGATACAAGTCCCCCTATATTTTACATGAATGATACATCCCATAAGAT
AATCAGCATTGTTGAAAAGTGGAACCGTTCAGAAGAAGCTCCCCAGGTAGCTTATACGTT
TGATGCAGGGCCGAATGCAGTTCTAATTGCACGTAATAGGAAAGCTGCTACCCTTTTGAT
TCAGAGGCTGCTTTACTACTTCCCTCCAAATTCAGATGACCTCAGCAGTTACATTATTGG
TGACAAGTCAATTGCAAAAGATGCCGGGATCAATGGAATACAGGACATAGAAGCTTTGCC
ACCACCTCCAGAAATTAAAGATAATATTCCATCAAAATCCAAGGGGGATGTCAGTTACTT
TATATGCACCAGACCAGGAAGGGGACCTGTTGTGCTTACTGATGAAAGTCAAGCTCTTCT
CAACAGTGAAAATGGGCTTCCCAAATAAGGTTCATGGGAAATGTTCCCATGGTTGATCTA
TTCTTCATCAGGCTTAACTGTCAGGCTTTATTAGCCCGAAATATTTTTCTTAGATGACCC
TTTCTTCATCTGTAATTTCTTATTTTCAAATCTAGTTAGTCTATTTTCTGCGAGAAAGAA
AAATAAATCTCGTTCCTTTCCTGTATTGAATTAAGCACCTTTAATTTAACTCTCTTGAGC
TTGCAAGTTCAACTTGTCATCATTTTATGTGAAC
FPS
CAGCCACACTCACCGGCTGAGCATAACACCTCTCTTTGTCGTTCTCTCTCTTTCTCTTCT
CTTTCATTCCTCTATTTATTATTACTCCTATTGGAAGAAACATCAACAACAACGTTTTTT
ATTCTCTTTCTCTCTCCTTCTTTTCATCAATGGCAGATCTCAAGTCCACATTCTTGAATG
TCTACTCCGTTCTCAAATCTGAGCTTCTCCATGACCCTGCTTTCGAATGGTCTGATGATT
CTCGTCAATGGGTTGATAGGATGCTGGACTACAATGTGCCTGGAGGGAAGCTGAACCGTG
GACTGTCAGTTATTGACAGCTACCGATTGTTAAAAGAAGGACAGACATTAAATGATGATG
AAATTTTTCAAGCTAGTGCTCTTGGTTGGTGTATTGAATGGCTTCAAGCATATTTTCTTG
TTCTTGATGACATCATGGATAATTCACATACCCGCCGTGGTCAGCCATGTTGGTTTAGAG
TACCCAAGGTTGGAATGATTGCAGCGAATGATGGAGTTCTACTACGGAACCATATTCCGC
GTATCCTTAAGAATCACTTCAAGGGAAAGCCGTATTATGTTGATCTTCTTGATTTGTTCA
ATGAGGTTGAGTTTCAAACTGCTGCAGGACAGATGATAGATTTGATCACCACACTGGAAG
GAGAAAAAGACCTGTCCAAATACACATTATCACTGCACCGACGCATTGTTCAGTACAAAA
CTGCCTATTATTCATTTTACCTTCCAGTTGCATGTGCATTGCTTATGGCGGGTGATAATC
TGGATAACCATACTGATGTAAAGAACATTCTTGTTGAGATGGGTACATATTTTCAAGTTC
AGGATGACTATTTGGATTGCTTTGGTGATCCTGAAACAATTGGAAAGATAGGCACAGATA
TTGAAGACTTTAAGTGCTCTTGGTTAGTTGTGAAAGCATTGGAACTTTGCAATGAAGAAC
AAAAGAAGGTTTTACATGAGAACTATGGGAAGCCAGATCCAGCAAATGTTGCTATAGTGA
AGACCCTTTATAACGAGCTTAATCTCGAGGGTGCATTCACGGAGTACGAGAGTGCGAGCT
ATGAGAAGCTTGTAACCTCCATTGAAGCCCATCCCAGCCAAGCAGTTCAAGCCGTATTGA
AGTCCTTTTTGGCTAAAATCTACAAGAGACAAAAGTAGATTCACTGCAAGGCAAAGGCAA
TATTGTTGAAGATGCAATAGAAGCTTAGCTAGAATCCTGTTTTCTGTGTGGAACTGTATT
TTTTTAAAATCAAATTTCTTATTGTCTCTTTTATTGGGGGTGATTAGTCTTGATGTACTT
TGTCTTGTAATCTGCCTTGT
SQS
AACAAAAAATCCGTCCTAATATTCAACCAACAAAGTTCATTTTTTTTTTAGTTAAACACG
ACCCGGTGAGAGACAGTGTAGATGCGAATCTGCACATCTCAAAAACCGTAAAACCAAATA
GTAGTTAGCATCACTATCTTTCAACCTCCAAAATTATCACAATCACAAAAAAATATCAAA
TGGACAAAAATTCTCATCATTGAAATTCCAATTCCAGAACAAAAAATCATCACAATCGCT
TATTCGTTTCTTTGATTGTTCTAGAAACTTAACAAGATGGGAAGTATAAAAGCGATTCTG
AAGAATCCAGATGATTTGTTTCCATTGCTGAAGCTCAAAATCGCGGCCAGGAACGCCGAG
AAGCAGATCCCGGCGGAGCCGCATTGGGGATTCTGTTACTCTATGCTTCATAAGGTTTCT
AGAAGCTTCGGTTTGGTTATTCAGCAGCTTGGTCCCGAGCTTCGTGATGCTGTTTGTATA
TTCTATTTGGTTCTTCGTGCTCTTGATACCGTTGAGGATGATACTAGCATAGATACAGAT
GTCAAGGTTCCGATACTAATAGATTTTCATCGCCACATCTATGATAATGATTGGCACTTT
GGATGTGGCACGAAGGAGTACAAAGTTCTAATGGACCAATTTCATCATGTTTCAAAGGCT
TTTCTGGAACTTGGAAAGAACTATCAAGATGCAATTGAGGACATTACGAAAAGAATGGGT
GCTGGAATGGCGAAATTCATTTGCAAGGAGGTAGAAACAATTGATGACTACGATGAATAT
TGTCACTATGTGGCAGGACTTGTTGGGCTGGGTTTATCAAAGCTTTTCTATGCCTCTGGT
AAAGAAGATCTGGCTACAGACAAACTTTCAAATTCAATGGGTTTGTTTCTTCAGAAAACC
AACATTATTCGAGATTATCTGGAAGACATCAATGAGATACCAAAGTCACGCATGTTTTGG
CCACGGCAGATCTGGAGTAAATATGTTAACAAACTTGAGGATTTGAAATATGAGGAAAAC
TCCGTTAAGGCTGTGCAATGCTTAAACGACATGGTCACTAATGCTTTGCTGCATGCTGAA
GATTGCTTACAATATATGTCTGCATTACGAGACCCCTCTAATTTTCGCTTTTGTGCTATT
CCTCAGGTAATGGCAATTGGAACACTTGCAATGTGCTACAACAACATTGATGTCTTCAGA
GGGGTAGTTAAAATGAGGCGAGGTCTAACTGCCAAGGTGATTGACCGAACAAAGAATATG
GCTGATGTCTATGGTGCTTTCTTTGATTTTGCTTCCATGTTGGAGTCCAAGGTTGACAAA
AACGACCCCAATGCAACAAAAACATCGAGCAGGCTGGAAGCTATACAGAAAACTTGCAGA
GAATCTGGTCTCCTAACCAAAAGGAAATCTTACGTTTTGAGGAATGAGAGCGGATATGGC
TCAACCATGATTCTCATACTGGTGATCTTGTTTTCCATCATTTTTGCTTATCTCTCTGCC
AATCGTCATATGAACTAATCAACTGGTTTTCTGGCCTTTGCAAACATGGATAGCAATGGA
ACAGTGGGTATGCCCCACTCAGGGAATGTGAATTTACATGCACGGGAGTGATGTTTTGAT
GCATGCATTTGAAAATTGTGTATTCTATTTGAAATGAACAGTAGTAGATATAGTTCCTAG
TTTCCTATGTTGGATTGAACTTTACCTATTATGCGTGTTGTCAGTTGATTATATAACAAG
GATCATGTTGGAAGGAATTCCGAATGAGTGCTACGGAGATCAAAACTCCATCCTCCCCCT
TCTTTGTCTTACCTTGGGTTTTATGCCATAATTGTTTGATGTTGTTTTGCTTGCATGTTG
TATTTAGCTTGGGTAGTTAGTTAAAGAAACTCCTAGAACTCGAGCCAAACTTATTATCAT
TTGGATTATGGTTTTTGCGAAGTGAAGAGTGAAAAGAATTAGGACACAATACAATCTTTC
ACCACACTAGGTGCAATGAGCCATGAACAGTCAATACTACACTATGTTATAGGTTTTTTT
TGAAAGAACACTATGTTATAAGTTGGAAGATGATTTTTTGACTATACACTTAAAGATAAT
TT
SQE1
CCAACCGCAGAGACTAGTCTATTGAATCGAATAGAACCACAATAGCAACAAAACTCCCCT
CAAAAGTTTTAATGTTAGTGCATTTCTATGACTACATTCGAACTCATAACCTCTGATTAA
GAGGGATGATAGTTTTAGTCTAGTTTAAACTTTAATGTAATGGATTCAATTTTCTAAAAT
AGCAAAAAGGAAATGGAAAAGAAATACATGCACTTTTGAGATTATTATACCAGTTACAAA
CTACAAAGAATACACACTATGCCAAAATGTATTCATATATCTAATAGCATCAACCTTTCC
TCAATTTCTCAAGAACGGATGATAGAGCTAGCTCATCTTGATAGCAACTTTGTTTTTTCA
AAATGCATTTGCCAATACTCACTCTTGTGAAGCCGGGGGAGCTCTGTAATAAGCTGGTAC
AGTGGCAGGGAAAAACATCTGCCGAATTCCTTCGGCCTTAATTATGGGTAAAATGATTCC
AGATGCACCAGAGAGTAATCGAGCTCCAATCCATGCTCGTTTAGGTGAAGGAAATGGTAA
CAGTAAACGGCCAACACCAAATACTGCGACAGCAAAGAAATGAAGAACCAAGCTTAAGGG
CCGAGGGTTTAATCCTGAAAGTAAAGAGATCGGTCCTTCTGAGAATAGGCCTCCAAGGCT
CAGATAATCAAAACAAGCTTGGCGCATTTCCTTCCTTGCAGGATCGGGGGATGCACTGAA
AACCTTGTAAAGGGCTCCTGCCAATGTATTTATTGTGGATGCCACAGGCTTACGCAAGGT
ATAAAAGGATTCGAGGTATTTGCAAAGTGCAGGTGCATCGTTCAGGTCACGCAAAGGCTT
GAGAAGATTTCTCAACACCACAATGTCAGACAATGCTACGGTCATTCCGCCCCCTGTTAG
TGGATGACGCATGTTGAATGCATCTCCCATCAGTACAGCTCCAGGAGTAGGACGAGGATC
TGCTGGCATACTTCTGTTCGGCATTGTCCTAATGTTGCCTTTGTCCACTGCGGCTATGAA
TGCATCATAAAGCTCAGGGGGGACCTGCGGAGCAACCGTTGTCTTTAGATACTTTGTCAT
ATCACCGTTTGAAATAGAAGGAACCTTCGTACCAGGTACATCAACAAGACAACGAATCTC
TGTACTGCTTATAGGATAGAAAAGAATTGGGGAAGGATCTCCAAGTATGACGTGGCCATG
ATTGGCACATGGAAGTTCACAGTTTTCTAAAATTAAGCCAACAAAACAAGAGGGATTATC
TACCTTAGGGTTGCAAAGAGAACGACGCAAGTTTGAGAAACAGCCATCACAAACAATGGT
AAGAGGAGCGTATGCTGTCAATGCCTGACCATCTTTATTTTTGTATTGCACACCTTTGAT
TGTCCCCTTCTCTTCAAGTAGGGAAATGACTGTTCCTTGCTCCAAATTTACATTGGGAAG
GGAGGCAGCCTTCTCTCGCATCCTCTGAATAAAACGCCCATTGTGAAAACTTCTGCCAGA
GACATCTGAGTGAAACTTTTCCAAGGGATAAGAGAGACGGGTATGTTTCCCATCCTTGAA
AAGAGCATAACCAAACACTCTCTGCGCATCAATGTTGTCTACACAATCTTGAAGCCCCAG
TTCAACTAATTTGAGATAGCCACCGGGTTGTAGCAACTCTCCAACGATTCTGTCAGGCTC
ACTCAGATCTCTTTCAATGACATGCACTCGGCGTCCATCCTTCCCAAGAGTATGAGCCAA
AGCAGCACCAGCAATACCAGCACCAACAATTATAACATCAGCATCACCGTTAAGTTTCTC
CGATTTAATCTCTCCAGCATCAGTACTCGTCACGCTATCCTCCTCACGCTGATTCACCTT
CTCCGGCGAACCATAATTTCTCCTCTCGGTGAAAATCAAATTGTATAACGCAAATAGACT
CAAAACAGTGCTTAAAATCCAACCGAGCAAATACAGATCCATCATTACGGTGGAAGAATC
TCGTCGGAAGAAACAAACGGCGGAAGTGACGGAGAAAGAGGTGTTGGGTTTGGGTTTTGC
GTTGGAGATTCTTCTTATCTCTCTGCCAAGGTGGCAAAGGAAAAATGAACGGTTTTAGAT
GTAACGGAATTCGAGGGAAAGAAGTGTGCATTTTATAGTGCATGTGAGATGCGAGACGGC
CAGGGACGCATCTTATTAGCT
SQE2
AAGTAAAGAAAGAAAGAAGAAAATCTACCTTTCTCATTTGCTTCTATATCATTCTTATAA
CCAATTTCTTGGAGATGGATTATCAGTATATTCTAGGAGGAATTCTTGCTTTTAGTTTTG
CATTTGTGTTTGTTCTGTATAGTTTTGCACAAAAGAAGAAAAAAAGTTCAAGTTCAATAG
ATGTAAAAAGTAATGGATATGCAAAAACATCATCAGAAAATGGAATATGCTCACAAGAGG
TTGAAGGAGAAACAGATATCATCATTGTAGGTGCTGGAGTTGCTGGTGCTGCTCTTGCTT
ATACACTTGGAAAGGATGGACGGCGAGTTCATGTGATTGAAAGAGACTTGAGTGAACCTG
ATAGGATTGTGGGTGAATTGCTACAACCTGGGGGCTATCTAAAGTTGCTTGAGTTGGGTC
TTGAGGATTGTGTGGATGAAATTGATGCTCAAAGAGTGTTTGGCTATGCACTTTATAAGG
ACGGGAAAAATACCAAGCTATCGTATCCGTTGGAAAAATTTAACTCTGATGTATCTGGAA
GAAGCTTTCACAATGGTCGTTTCATACAAAGAATGCGAGAAAAGGCTTCATCTCTTCCAA
ATGTAAAATTAGAACAAGGAACTGTTACATCTTTACTTGAAGAAAATGGAACCGTAAAAG
GAGTGAACTACAAAAACAAGAGTGGACAAGAGTTCACAACAAAGGCTCCTCTCACCGTAG
TATGTGATGGTTGTTTTTCCAACTTGAGACGTTCTCTTTGTAATCCTAAGGTTGAAGTGC
CCTCTCATTTTGTTGGATTGGTTTTGGAGAATTGTGATCTTCCACATGCAAATCATGGAC
ATGTTATCTTGGGTGATCCTTCACCAATTTTGTTTTACCCTATCAGTAGTACCGAGATTC
GTTGTTTGGTTGATGTGCCTGGTCAAAAATTACCTTCAGTTGGTAATGGTGAAATGGCTC
ATTATTTGAAAACTGTGGTAGCTCCTCAGGTTCCTCCAGAGTTGTATGCTTCTTTCATAG
CAGCAATTGATAAAGGCAACATAAGAAGCATGCCAAATAGAAGCATGCCTGCATCGCCTT
ATCCCACACCCGGCGCTCTTCTGATGGGAGATGCCTTCAATATGCGTCACCCTTTAACAG
GAGGAGGAATGACCGTGGCTTTGTCAGACATTGTTGTGCTAAGGAATCTACTTAAACCTC
TACGTAATCTGCATGATGCTTCTGCTCTTTGCAATTACCTCGAGTCATTCTACACCCTAC
GCAAGCCAGTAGCATCTACAATAAACACATTAGCAGGTGCATTGTACAAAGTGTTTTGTG
CATCTCCTGATCCAGCTAGCATTGAAATGCGCCAAGCATGTTTCGATTATTTGAGCCTCG
GAGGTGTTTTCTCAAATGGACCAATAGCTCTACTCTCCGGTCTGAATCCGCGTCCACTGA
GCTTGGTTCTCCATTTCTTTGCGGTGGCTATATACGGTGTTGGCCGCCTATTGATACCGT
TTCCTTCTCCAAAACGAATGTGGATCGGAGCTAGATTGATTTCTGGTGCATCAGGTATTA
TTTTTCCTATAATAAAGGCTGAAGGAGTGAGACAAATGTTTTTCCCAGCAAGTGTGCCAG
CATATTACAGAATGCCTCCTGTCCATTAACATATTGTATGGTATGCAGTATATCCACATG
TGGACCATTAATTGCCAAAACAGATGAGTGGTGGACT
CAS1
AACCAGTTCTATTGTTTAACAGTTCAAATTATATAATCTGAACAAAGGGTATTTTGGGAA
AGAAAAAAAATAGGGCGCGCGAGTACATCATAGGGTGGAAAAAGTAATAGTCTAAATAAA
TTGTACCAAAGTCACTTTATTTTTCCTACTTTCTCCTTACAAACCAACCACGTTATAATC
TCCTCACTGTCCATTGGATTGAGCAAAAAAATTCCTTTTGACCTCCCACATATTTCTCAG
ACTTCCGTAAACAACTATTTGAACCAATAACTAAAAATACATAACTGTGCTCCTTGTGCT
AAAAAGAAGGGTGACACTTTTTCCCTTGCTCTCTGTTTAGCAGGATACCAAACCCATTAA
GTTATAAACTTTTTCAAGAAGAGAACCATGGAGGATGGTAAATGGTCGAAATAAGTCGAA
CGGTGGTGTCCTAACTAAAGCGAGATCAGGCCTGCAATACATGACGACGGTATTCTCCCA
ACGCCCAAATGGGGAATATGTTTCTGTATGCAGCATAAGTGATCATGCAATTCTTGTTGA
AGACTCCCATTATTTCCTCTTGCGGAAAGTCACCATTCTCCATTTGGGAATTTATCAAGC
ATACAGCTGCGTGGTGCAGTGGTGTTGGATCTCTCTTAGCCTGTTCAGCCTCAATGAGAG
CCAGCATAGCCCAACCAGTGTTTACTACATGGGACCTGTTGCTTTCCAAATTTGAATACA
CCTTGTTTTGACATGACAGATAACTCTCTCCCCAACCACCAGATGGGAGCTGCTTAGACA
GCAAAAAGTCACAAGCTTTACGGATACTTAAGCAATTACTGAAACTCTTCCCAGCAGCAA
TCAGCCCTTTTACCCCAAACCAAGTGCCATAAGTGAAGCAAACTCCCCAAGAACCATACC
TGTTTAGCAGTTTGAGTGGTTAGTGGTCAACTAAACGAAGTTCAATTTCGTTCTGAAATT
GAAGCTGACAAAAAGATGAGTAGAGCAAACTTGCGATGCAGGGATACGTAAAAGATATAT
AATATCAATAGAAAATCTTATTAAAAAAGTGGTCTCCCATAAGGAGGAGCAAACCATGAA
CCATCTGAAGCTTGTATTTTTTCAATAAAGGCAGCAGCTTTTTCTATACAGTGTTGTATT
TCTTCCCGACGATGCCCAGGGTATAGTTTCCTAAATGTTGACAAAGCCTGAATTGCTGCT
GAGGTACATTCCACATAAGTATAATCAATAACAATGTCGCCAAAAGTTTCAGCAGGATTG
ATTATCTCCAACCACTTATAAGATCGTGTGAGCTCATATGTTGCAAGGCCACCATCTTCA
TTCTGTAACGAGATAATGACATTTACAGCATCATAAAAGCTCTTTGCATCCAATGGTTCA
CCAACAATCTCAGGTCCAATTTTAGATAACAATAGAACAGCTTTCAGTCCTTCAGCTGTG
CAGTCAGATATTGGCCATCCATGATCTGCAGTTGAAAAAGGCCAAGCCCCTTTTGAAATG
TGACGGTACCATTTACTAAGATCACCCGGACAATCTTCTAAAACCTGTGAATTCTTAATG
AATGTATGAGCTTTTCTTAGAGTTGGAGCAAATTCGTCAATTAGATTAGTTGAAATAACT
GCTTGGACGGCAAATGCAGTATCCCATAGTTGACTTCCATTGTAGCCCTGCATTTTCATG
CCATCCTCAGCAATCCATAGAAAATCGTGGATCCTTGGAAGATGCAACTTGAAAGCCTCT
GAATTTGGATCTTCCACCCAGCAGCAAAGCATATTTAACACCTTATTTACAGGACCTATG
CAAATATAGCGAGTATTCTCATCTTCATAATGTACATGTTCCATTACAGTCTCGACAGCC
TTTTCTCTCAATTTTTTGCCAGGCCAATTCATGAAAATAGGCTCAACAAACTTGTGTAGA
GACGCCCAAAGAATATCTTGCACGAGTGGGTGAGGATAGTATAAGTCTTCCTTTGCACAC
AAATTGCGAGCCTGATTCCAGTCTATATCATGGTATGGTACGGTAAAAAGCTCTTTTCTC
AAAGATAATACTGTTGGTGTGATTGGACCAACAAACCTCTTGCCGTACAAGTAGGACATT
GGCAAATAGACCATCCGGCAGTGACACCACATCCTTCCTGGATGAATTGGAAGCATGTAT
GGAAGGAGCCATATCTCAGGAGGCAGGGGATTATTTCCAGACCATTCAAACACTCCAAGT
ACTGAAAGCCACATCTTCCCCCAGGATGTTATATAAGTCGCACCACCATGCTCAAGAATC
CAGTCACGTGCCTTCTCCATTTCCCCTTCTCCGTCATTTGGCCCCTCACCAAGCAATCTT
AGAGTAACATAACACAAGACAGAACCAAACATGGTGCTTGGACCTTCAATATGCAAACCC
CACCCACCATCCTTATTCTGATGATTATAGAGGTAACGGCGCATCTCCTTTTGATGCTCG
TCTGTTAAGACTGCATTGAGAGCCCCAGTGATAGACAAAGCAATGACCAAGCCAGGCATA
AGAAACATGGGACCACCATAATCACCAGGCCAATGTCCATCACGACTCTGAAGAGTTGAA
TAGAAATTCAAAGCTCTTCTTAATGTTGTTGTCACACTCTCTTCGTTTACATCTTCAACA
TCTTTCACTCTTACTTTCGGTATCACTTCGCCCATCGGATTCTCTTTCGCAAGCTGAATG
CGCATGAGTAGATCATCGCTGTGTTTATGGGAGAAGCGATTATTGTGAAAATTTTGACGA
ACGGATTCGATTTGATCTAGCTCTTGTGGAGATCCGGAGTTGGGATCGAACTCCCAGACT
TGTCTACCGACGTAATTGTTTACTGTTCGAAGCCATGGACTACCTCCCTCAGCAACTTTC
AGCTTCCACATTATTATTCACAGTGTAATGAGATTTGATTTGATTTCAAAGAGAGGAGAA
TCAAATCAATTGAAATAGTGATTGATATGGATGGAGTGAGTGGTGGAAGTATTAGTAGAC
TAGTAGTAGTAAATGTAAATACTTCCTGCA
CAS2
AACGTATTGTGTGATTTGAGGTAATGTTTTCTTTTGATCTTTTCAATGTTTAGTGTGCAA
TTGACCAGGCCCTGTTAGCCAACTTGACAAGAATGTCGTTGGACTTGCACTTAGCAAGGT
CATCCCTTGGATCTGAATCACGTACCATTTCCAAGGCTGCTGATGCTTACATCTCAGCAT
GAATAACTGCCTCTTCAATTTTCTTCTTAGTGAAATTAAACCTGATCATATTTGAATGAT
TGTCATGATTGAAGTAATTAATAATAAATGAGATACATATACTATGAAGAGTCATTATTT
GATATTGACTTTGATCTGGTTCATTAGATTCATTTGCACAAGGTTATACGGAATAAGGCA
CTCAATCATGTTATGAAGCATATACACTATGAGGATGAAAACACTAACTACATTTGCCTT
GGTCCTGTTAATAAGGTTATATATAAACATGTTATGA
SSR2
TTTTTACAAGTTTGGAAGCTAACTGGCTATAATGAAGTGACCTAGTTAAGTCCAAAATCA
CTTATTTATAATAATTTTGTGGTAGAGTAAGTAACCCTAGTAATTGGTGTTTTAAATCTT
CTGTTTCACTTGTTTTCTGACTCACTATCAATTTGTTCAACTAAATTGATTTGATTCACC
TTTTACTTGTTTAGTAGTGAAAAAAAAACACTTTTTGATTTCCTTTGTTCTTTTAGAAGT
GTGTTGTATTATCACAAGGCTTAGAAAAACTGTTGTGTCACTTTGAGACATCAACGTTTT
TATGTCTCTGCAACCAATTTTCTGCAATTTCAATAACTGTGAAGTGTAAACACTAGTGTG
AGTGAATAATTGACTCTTTAAGAGCTGTAGTTGTGAAATTTCAAAGGATTTACATTTATT
TTTCTTTGTTGCAGTAAGAGACGAGCGTTATAATCTGAGCAATGTCGGATCTTGAGGCTC
CCCTGCGCCCGAAGAGGAAGAAGGTTTGGGTCGACTATTTTGTTCAGTTTCGATGGATCA
TTGTTATCTTTGTGGTCCTTCCCATTTCCTTCACACTTTATTTCCTAACATACCTTGGGG
ATGTGAGATCTGAGTGGAAGTCCTACAAGAAGAGGCAGAAGGAACACGATGAGAATGTCG
AGAAGGTTGTCAAACGTCTCAAACAGAGGAATCCCTCAAAGGATGGCCTTGTCTGCACCG
CTCGTAAGCCATGGATTGCTGTCGGAATGAGAAATGTTGACTATAAGAGGGCTCGTCATT
TTGAAGTTGATCTTTCGGCTTTCAGGAACGTTCTTGATATCGACAAAGAGAGAATGATTG
CTAGAGTAGAGCCCCTTGTCAACATGGGGCAGATCACGAGGGTGACCGTGCCTATGAATC
TTGCACTTGCTGTGGTTTCTGAGCTGGACGATCTTACTGTTGGTGGCCTCATAAATGGTT
ATGGGATAGAGGGAAGTTCCCACAAATACGGCCTCTTTTCCGATACTGTTGTGGCCTTTG
AAATTGTTCTGGCAGATGGAACTCTTGTTAAGGCCACAAAGGACAATGAGTACTCTGATC
TATTTTACGCTGTTCCATGGTCTCAGGGAACACTTGGGCTTCTTGTTGCTGCTGAGATCA
AGCTTATACACATTAAGGAGTACATGAAGCTAACCTATAAACCAGTTGTTGGTACCCTGA
AAGATATTGCACAAGCATATGCTGATTCTTTTGCTCCCAGAGATGGGGACCAGGATAATG
ATGAGAAGGTTCCCGACTTCGTTGAAACTATGATTTATTCGCCAACACGAGCTGTGTGCA
TGACGGGTAGGTATGCTTCGAAAGAAGAGGCCAAGAAGAAGGGGAATAAGATTAACTGTG
TAGGGTGGTGGTACAAAACCTGGTTCTACCAACATGCAGAGACAGCACTCAAGAAAGGAC
TGTTTGTAGAATACATTCCCACCAGAGAATATTATCATAGGCACACAAGGTGTTTGTATT
GGGAGGGAAAGCTTATCCTCCCATTTGGTGATCAATGGTGGTTTAGGTTTCTGTTTGGAT
GGGCGATGCCCCCCAAGGTTTCTCTGCTCAAGGCAACTCAAGGTGAATCTATTAGAAACT
ATTACCATGAAATGCATGTTATCCAGGACATACTTGTTCCTTTGTACAAGGTGGGAGATG
CACTGGAATGGGTTGACCGTGAAATGGAGGTCTACCCCCTTTGGCTCTGTCCACACAAAC
TGTACAAGCTGCCAGTGAAAACCATGATTTACCCAGAAGCAGGCTTCGAGCTGCAACGCA
GGCAGGGAGACACACAGAATGCTCAAATGTACACGGATGTTGGAGTTTATTATGCACCGG
GTCCTGTGTTTAGGGGTGAGGAGTTTGATGGTGCAGATGCTGTGCGTAGATTGGAGAGCT
GGATGATTGAAAATCATTGTTTTCAGCCACAGTACGCTGTGTCTGAGCTGAATGAGAAAA
GCTTCTGGAGGATGTTTGATGCTGGTCTGTATGAGCATTGTAGGAGGAAGTATGGAGCTG
TTGGGACCTTCATGAGTGTGTACTACAAATCAAAGAAGGGCAGGAAAAGCGAGAAGGAGG
TGCGTGAAGCTGAACAAGCACACCTTGAAACTGCATATGCAGAAGTTGATCAACCAGCAG
ACTGATCTGGAATTCTGATTCCTCTGGTGGTAGAATTTGTTGTTCCTTGTTGTTTCTGAA
TTTATCGTTTTGTCTTTGAATTTTCGGATCTTTAGCTTCAGATTGGCTTAGTTGCTGATA
ATGTTTTAGAGTTTCCAATGTCTTTTTATTAATAATGTGGACCTAACGTGATGATTTTAA
CTGTTTGAGACTGATATGGAGAAATTCTTGCCTTAAAATACAATGCATATCCCGATATTT
GTGTCGAAGTAGGTTTTAGGTTTGGTTGCAAACGAACCTTTGCCACAAAGTAACTTTATT
GAACATCTTCATACCCAGTGCCAC
SMO3-1
ATGGCTTCAAGCTTATTCTTTGAAAATTAACAACACAAATCATTGGACAAATTACTTGGC
ATAGCCTCCACCCATGGCATAGTACCGATTATTAATTTTTGAAGAGGGAAAGTGCCAATT
ATTAGCAAACTAACTAAATTATTCAACCTAATAATTACTTGGCATAGCCTCCACCCATGG
CATAGTACCGATTATTATAGAAAACAAACTGACTCAAATATATAAGATTTTCCTTGAGAA
CTTTAAACAGCTATTCCACCTTGTTATTTTGGGCATCGAAAGTGTTTGTTGGGGACATTT
TCTCTTGCATCCTCTTTTTGTATTGGTACCCCTTTTGTGTCCCGTAAATGTAATCACAAT
ATGTAAATACAGAGGCAAAGTTTCCTTGACTTCGTTCACCAACAAAATGATGGTAGTCAT
GGTATGCAGGACCTCCATAAAATGGTATATATTTTGTGAAACTCCAAGGAAATTCATACC
CGCTATGTGTCTCAATGGCTTCAAGCTGTCGCATAACGAACCATAACCAATAGGTAGTTA
TGTGCCCCGGAACCAGTGCTGGGCCAAGAAATGCAGGGAACCCCAGTATCAATATCTCAG
ACCAATGTGCATAGGGTGCTGCAAGTCCCATAGGTGTTTTGAATTCATGATGAACAACGT
GAATATTATCAAATGCCCATTTGTAATGGAGCATTCTATGAACCCAATAGGCTACATAAT
CTTCTATAAGAACATAAACTAGTAATTGTGAAAACAACTCCCAGCCTGATGGTAATGATA
ACCCTGTTCTGATTCCAAGCAACTTAATAGTAGGATAAGAAACGACCTGAAGAGGACCCA
CTGCAATGATAAATGACCACATAACATATTTGTAGCATTTGAACATTTCCAACAATGTCC
TCTTCACTGAAGGTTGAATCTTGTATTTGTGCAACTTCTTGTGTCCACTAAGCTCAATTA
GTGCAAATGGAATAGGAGCTATAGAATAAAACAAGCACAAGAATAGAGTGTTGTGGCAAT
GAAGAACAAAGTCAGATTTTTTGGCAGAGTAATTGAACCATACTGTCTCAGCAAAAGTGA
GATTTCTACCAAGTGCATATTTTGATTCTTCAAGGGTATGGTATGGGAGCATGGTTAATT
AGATAAGGAGGTGGAAGAAGAGAAAATCGGTGGAGAAGGATGGATGACC
SMO3-2
AGGGACGCATGAACAGGCGATTACATAAAATCGAACTTCCAAATTTTATTATGCTTTTCG
AATTACATCCAGAGGAGGAAGCCTGTTTCACATTTCCAGAAATTACAATCCACAGGGATA
TGATCATTCTTACATAGTCATGAAGCTAAACCAAATATGTTTGAATTCCAAAACATGACA
ACAGAAGAATTTCTTCCTCAACCCACTCTTGTAAAACAAAATCACAATTCGTAAAGCCCC
GTTCTACTAGTCTTCATCCTGAAGCTAACCAAAGACATCTATTTTACTAGTACTAATTAT
ATGTCTACAAGAAAAAAAGAACCAACAAACAACATACTCAGAAACTGCCTAGAATGCTTC
TGTCTCATTCAGATTTATAACTATCCTGTGCATTGTATGATCCTCCGTTCTGCACGGCAC
CATTTGTCAAATCTTCCTTCAGGTTTCGAAGTATCTTCTTCTGATACCGAAAACCCTTGT
CAGTTCCATATATGTAATCACAGTATGTGAAAACTGATGCAAAGTTGCTATGGCTTTGTC
CCCCAACATAATGATGGTAATCATGATGCTCAGCGCCACCATAAAATGGAATATATTTTG
TGGGATTCCAGGGGAAGTCATACCCGCTGTGTGTATCAATGGCTTCAACTTGTCGCAACG
CAATCCATAACCAAAATGTAATCATGTGCCCAGGAACCATAGCCGGTCCAAGAAAAGACG
GAATCCCTAAAATCAAAATCTCCGCCCAGTGAGCATAAGGCGCCGCAAATCCAATCGGAG
CTTGATATTCATGATGAACACGATGAATCTTCTCATAACCCCATTTATTATGTAGAAATC
TATGGATCCAGTAATTCGTATAATCTTCCACCAAAAAATACACCAATAATTGTGATAAAA
TCTCAAATCCAGACGGTAATGGCAATCCCGTCCTAATTCCAATCATCTTGATGGAAGGGT
AAGAGACGAGTTGAAGAGGACCAACGACAAGGAAGAACATTCGCATGACATCTTTGTAGC
AATTAAGCATTTCATGGAGAGATAAACGAACTTTGGGCTGGATCTTGTAGGAATCGAAGG
GGTACAAGCGTTTGATTTCGAGGAAAACGAGTGGAAGAGGGACGAGGGAGAAGATGAGGA
AGAGGAAGAGAATGTTGTGACAGAAGAGAAAGTAATCGGATTTGGTGGCGGAGTAGTTGA
ACCAGAGGGTTTCGGCGAAGGTGAGATTGCGACCGAGAGAGATCTCGGCGTCGTGGAGGG
AGTGGTAGGGGAGCATCTTCGTCAGCGCCGGAGAAAACCCTAGAGAGATTGCCGGCGGCG
GGAGAGTAGAATAATGTGTGATGTAGAGAGAGACAGAGAGTGTGATTGTGCGGTGGATGA
TGCGCTGGATGGTTTCTCTGTTGTATT
CPI
CTAATTTACTGATAATTAATTAGATAGAGATCTAAGTCTAACATGTTGCATTAATGTTAA
TGTGTCGGCTACTTCATAATACAACATCAAAGCACTACAACAAACACACAACACAATCTT
TCAAAAAACAAAAAACAAACACAACATACTAATGTCTGATCAGAAATTTGGCACTGCAAG
CATTAAATACAAGGATAGTCCAAGTTTGTTTCTTCTGATATTCTCCACACATAACGGTCA
ACATTTTTGGATTGCTTTGTCCGTGTAATTCTCATGTGAGATTGGCGTGTGTTGAAAACC
AGGGTAATCCAGTTGAAGAACACTGTTTTGCTTCTGAGACCGGAACAATTGGACCCAGAA
AGATGCGCCACAAATCAAGTATTATTGTGACCAGCATCGCAGCACCCAAAGCATCAACAG
CTACTCTGGCCAAGTCCCATTTATTGCCAGGTTTCTCATCAACCCTTAGAAACATTGGGA
AGCTCACGATAAAGTACATTGCATAAAACAATGATCCAACTTTGTACATAGAGTCTCGAT
CCACAAATTCATAATAAGGGAAATTGGAAATAGCCAATGTCTCCAGGTATGCTATAAAAT
AAGCAAGAGCGAGGATCCATGCAGCTTCAGCAGCCCACCGAATTTTTTCTGGCGTATCAG
CCAGAAAATGTCGTAACCGGCGCAGTGTCATGTTCGATGCAACATGATAAAAGAGGAAGC
AAACATGAGTGAACAGGAATGTTGTGTGTGGTACATTGTTCATTCTCCATGATGGAAAGG
TATAAGATGCACCCAGAACTGTGAAAAAGTAATGAGTCCAGAAATAATTCCCAACATAAC
TGAAGATTATTATCCAGAGACTGGCCTTGACCCAATAACGGTTGTGCCAAGATATGCCTC
TATCAGCCTTACAAACGAACAAAATAGGAATGAGGAAAGCAGGAAGTGCTGAGACCAAGC
CAAGAAGTAAATACTCCAATTCAGTGAATTTCTCGTAAAGCTTATAAGGAACAACAATGC
CAAGAGAAAGGGAAAGCCAGAAAGGGGTGTAGAGAAGGAAGAAGAGTTCGCCCCATCTTT
TGCTGGGATTTTGAGCTAGCCACAAGCTAGGAGTCGGAGTCGGAGTCGGAGTCTGTGAAG
CGCCCATTCTGGAGAAGAGATCGATCTGATGAAAGATGAGAGATGAGATACCTCCTGAAT
TGAATGAATAGTGAATACTGAATACTACTACCTCACTCTTTCTCTTTCCTTCTTCACTCA
CTCTTTTATTGTCCGTCACTCACTTCACCTAACTCTTGTCGCATTCGTACCACCATCCTG
CCAGGTCACTTCGACTGACTCGG
CYP51
AACCACTTACTACAATTGCACAAAAACAGAATTCAAATTCAAGATTCTAGTTATTCAAGG
TCAAATGAACAGTCAACATAGACAATGAAGCAGAATAAAAAATACTAACAAGAAAAGCTT
AAAAAAAAAGAAATCCAAGCAGTACACTGAAGCACATCATGGTCCTAATGATTAACAGAA
AGCTCCCTCCGCTTGTATCGGACCATAACTTTTCCTTTCACTCCAACAACCATGGCATTC
CAATCAATCTCAGGGAAAGGTGACACAAGCTCCAGTTCAAAGTTCCTCAGAAGATGAGTC
CAAATTGCTTTTATCTGCAGATATGCAAAAGGCTCTCCAATGCATCCATGTCTACCACCT
CCAAAGGAAATGTACGAGAATGCCCCTGCTGCCTTGTCTTCTTCCCTCCCAACAGCAAAC
CTATCAGGATCATACTTATCAGGGTCATTGAAAATGTGTGGTAACCTGTTTGCAAATGCA
GGGGATGTAGCAACTATATGACCCTTGGGAATGTCATACTCTTTCCCCTCTCTTGTTGTC
ACGCTGAAATCGCTGTGTGAGCTTCTCAGCAACATAATTAGCGGAGGGTGGAGTCTCAAG
GCTTCTTTAATGCACCTATACAAGACATCCATCTCAGCCAAAACATCGTGATCAACTCTG
TCTCCGTGTTTCTCCATCAAGTTCTTTTGCTCCTCCTCCACAGCAGAAAGGTACTGTTTG
TTACACATGAGATATGCTCCGGTCCAAGTGGAGGTGATTGAACTGGTGTGCTGTCCTGCG
AAAAGAGAAGCAATGAGGAGTCCTGTGACTTCACCTTCTGTTGTTGGGCGACCGTCTTTG
TATTTTGAGTCAATGAAGCACTGCAGCATGTCGTCCTCTGACCTATTAGCACTTTTACGT
GAAGATATGATGTTGGTAAAGATTTCAGCAAGCTTCTTTCTTGCGTTGTCGCGGCGCCTG
TGAGCTGGGATTGGCAGGTATGGGAAGAGAACACTGATTGGAAGCATTCCATTGTCGAGG
TCATGGAACAAAGCAGAGACATCATCGAAGAGCTTGTCACGAACTTCGCGTCCCAACAGA
CATCTACTGGCTGTCAAGGTGATCAGATGCTCGAGCTCATGCTTCAAATCAACCTCACCA
CTTGATCCCCACTTTGAGAAATAGTCCTCAGCTTCAGAAACCATCTGATTAACATAACTC
TTGAGTTTAGTAACCCTAAGAGCTTCAGTAAAAAAGCGAAACTGTTCCTGTCTAATAGAA
TAATCAACATCAAAAACAACACCAGGACCAAAAGTAGGAACATTAAACTGATAAACCTCT
TGTTGACTAAGATCAGATTCAGGGGCCTTAAAGAAATGTGCTGAAACCTCAGGACCAATA
AAAAAGGTAATATTTTTATGAAAGATTTTCAATGTAAAAACACCACCAAGTTTTGGGTAT
TCTTCACGGAGCATAAGGATTGGACCTTTAAGGAAACGAACAAGTCCTCCAATAATGGGC
CATCCTTGAACAATTGGGGGTAAGCGTTTCTTTGATTTTGGGATTATGAATGATGAGATG
AGTTTAGCGGCGATTAAGGTTGTGATTAGGAGAAGGACAGTGCTGAGGAACTTGTTTTCA
TCAAAAAAATCCATTGATGATGGATACAATTGTTGTTGATGATTCCAATGATAAGTAAAG
AGAGAGTGGAGTGTGCAGATCTAATGTTGAGAGATCTATTATTATCACAAGTGGGTTGTT
GTTATTATAGAGATGATGAGTGGCGTGTGTACTGCTACCAACTCTCCATGTGTGATTGTT
TAGACGTATATTGTACGGGGTGGGT
C14-R
TCGGATTTCAAACTTAAGTCCGATAGTGACCGGAACCCGTCCGTCTAAGGAATAGCGTAC
AATAAAACCCTGCAAATATCTGTGCCAATACTACTTTATTGCCTTGAGACCAACAAAGTG
AGACTTATTACCCTTCACGTGACTTTATCCTTACCTGTTACCAGTACCTACCTCTCTAGT
TTCACTTTCTAAGACATCCACCCCCACCTTTTTCCAGTAAAGAAAGACATCACAAACCTC
ACTTTCCTCATGTTCTATCTTCAACATTTTTTGAAATGGGTTCTAGCTTCAACTCAGACG
CATGCATGATGCATACACAAACTTTATCTTCTCCATGTTGATGAATACTAAAGATTGAAA
CTATTGAGTACTTATTTTTTTTTATTAGTAGTTTCAACTGGAATCTTCTCGTCTACTTTT
TGTTGTTGAATAACTCCCCTTCATCTCTTGAACCGTTGAAGTAAACGGACGGCGGTGGAT
TTCATTTTCCCATCCGCGGTTGCCTCTCGGTTTGTAGTATCCATCACCATCAAAGTCACA
CTATCTTGAAGACTGCATAGTAGTGTCACACATGGATTTGGATTTTTTCATTCACGCTCT
AATTCCATCATGGAACTCCGTTGTTTTACTCGAGGGATTCTTCACTTATTTGGCCATTGT
TGGATTCATTCTCCCTGGAAAACTGGTTCCGGGTGTTGTTCTATCTGATTCAACTCGTCT
TCATTATCGATGCAATGGTTTACTTTCGCTTGTTCTGTTGGTTGGACTTCTTTGGATCAG
TGCTAAGATGGAATATGTATCTCCTACTGCCATAGCAGATAGAGGACTTGAGCTGCTGTC
TACAACTTTTATCTTCAGTTTTCTTGTGGCCCTCATACTCTATTTTTCCGGTTGCAAGTC
ACGAAGTAAAAGTTCATCGCTAAAACCTCATATCAGTGGAGACCTAATAGACGATTGGTA
TGTTGTGAATGTTAAAATTACTTTAATTGATTGCTACTTTAGTGGAAAAGTTCTAAAAGG
CCAATGTTCAAAAGTTGCAGGTATCTACATATTTCTTATTAACTTCTTAACCTTCAGAGA
GATAGCAGAAATATAATGCATGTGCAATAAGTTATTCAATGACCCTTATCCTTTCTTTTC
CAATTTCAATATGCTCCATTATCTTCCCACTTAATTACACGTCATTTAAACCATAAAAAC
TTATCCTTTTTCATGTTCCTTTTTTGATCTCTTACTGTGTACTTCCTTTAATAATTAATT
TATGATGTCTAACCGTGAACTATGACAAACAAAATGGGGAAAGTATAATTTCTAACCATG
TTCGTGACGAAAAGCTTGACTTTACTCCCCTGAAGAAACTTTGTTTCTATAGTTAATCTT
GACTTTACTCCCCTAAACTTTACTTTTATGGTTAATGTTTGTTTTATATTTTATTTTTAC
AGGTGGTTTGGAATACAATTAAATCCTCAGTTCATTGGTATTGATCTCAAATTTTTCTTT
GTTAGAGCTGGAATGATGGGGTGGCTACTTATCAATCTATCAATTCTTGCTAAGAACATT
GAAGATGGTACTTTGAGCAAGTCAATGATTCTCTTCCAGCTATTCTGCGCACTTTACATC
CTGGACTACTTTGTACATGAAGAGTACATGACATCCACATGGGACATAATTGCAGAGAGA
TTAGGCTTCATGTTGGTCTTTGGAGATTTAGTGTGGATTCCTTTTACTTTTAGCATACAG
GGCTGGTGGCTCTTGAGGAACAAAGTTGAGTTAACCACGGCTGCTGTTGTAGCTAATTGC
TTTGTCTTCCTTATCGGATACATGGTATTTCGAGGAGCAAACAAGCAAAAGCATGCTTTC
AAGAAGAATCCAAATGCTCCTATATGGGGTAAGCCTCCAAAAGTCATTGGAGGCAAGCTA
CTTGCTTCTGGTTATTGGGGTGTTGCTAGACACTCTAACTACCTAGGGGACTTGCTGCTT
GCTCTCTCTTTTAGCTTACCTTGTGGCATCAGTTCACCAGTTCCATACTTCTATCCAATT
TATCTTCTCATTCTGTTAATCTGGAGAGAAAGAAGGGATGAAGCTCGTTGTGCAGAGAAG
TATAAAGATATATGGTTAGAGTATCGCAAACTTGTTCCATGGAGAATTTTGCCTTATGTT
TATTAGTGGGGAGAGAAAAGGCTTCACCATTAATCTCTCATCTTACTCATGGATGGTGTT
AACCACTTTGTTGTAAATGGGTTCATGTAGTCCCAATGTATACACGTTCTGTTCTGTGTT
TGTACTAGGTAGTTTGCTTATATTCTTCCTTTTGTTACATTACCATATTTGTTTACCGAC
ACGTTTTTCATGTTATTGGTGCGAAGTATCTATTGTCCACCTTTACTAACCACGATTTTT
CATTTACAAAGTTTGAACCTGAGACCTTAAGAGAGATTCAAGTTCAATTCCTTTCGGAC
8,7-SI
ATTTCACACACTCTTATAGTCCAACTCAAAAAGAGTCAAACAAACACTCAAACTCAACAA
ATCTCATTCATTGTTTCAGATCCAAAAAGAACATGGAGGGATCTCAAACTTCACAAACTG
GTTCTGTTCATCCTCACCCCTATGTTCCACAAGACCTACATCTTCCTGGCTATGTTCCTT
GTTTCCTCTCTCAATCCAACATTCTCACTGTCTTTGGTTCCTTTGTTGTCATCATCTTTG
CACTCACATGGACCATTTCAGGACGCTTCAAGAAATCAAAAGTTGATAGGCTGCTAATAT
TCTGGTGGGCATTCACTGGCCTCACACACATGGTTATTGAGGGTTACTTCGTTTTTGCAC
CAGAGTTTTTCAAGGATAATACTGGCTTCTACCTTGCTGAAGTTTGGAAGGAATATAGCA
AAGGAGATTCAAGGTATGCAGCAAGGGATGCAGCGGTAGTAACTATTGAAGGACTAACAG
CAGTTTTGGAGGGCCCAGCTAGTATTTTGGCAGTATATGCAATAGCTACTGGGAAATCAT
ACAGCTACATACTTCAATTTGCTGTTTCATTGGGTCAGCTATATGGAACTGCTGCGTATT
ATATAACATCGATTTTGGAAGGCGATAATTTTTCTACAAATTCGTTTTACTACTATGCAT
ACTACATTGGTGCAAATTTCTCTTGGATTGTAATCCCCTCGATCATCTCCATCCGCTGCT
GGAAGAAGATTTGCGCTGCGTTTCAAGTTCAAAGCCAGACAAAAAAACCTAAGATTCGTT
GATGCAGACTTTTTAGGGTATCGTCAGTTTTCATGATCCTGGAACAAAGAATAATGATAT
CTAAGATGGTTGAGATTAAGACTTGTATCATTTGATTCTTATTTAATTTGCATAGCTTGA
AAAAACAATTTAGATTTTTAACTTTTATGTCATTCTTATGTATTTGGATTGACTAATGTT
TGCAATGCCACGCAATTACGCAATCAACACATTGGTTGTCATTGAATTGAGACCAAGCAG
TCAGCGCATTGCATACCAAACGAACACACGTTCGTCCCAAAAGAACTTTGTTGTATTGTA
TTGATACTATTGATTCGAACGTACATCTATTGTGACAATTGCAGCTATGCTGTCATGGAC
GAGGTTTGATTATTTGCTTTACTTTGTAATAATTACTTGCTTTCTAGAAGGGTTGAACAT
GGC
SMO4-1
TCTTGTTGTGGGATAGCCTTCGGTTCTGCCTCCCCTTTCCACTTCTTCTACTCTCCATCA
CTTATTCTCAAATTTCGCTTATGGCATCTTTCTTCGAATCTGCTTGGCAGTACTTGATTA
CACATTTCAGTGACTTTCAACTGGCATCTTTGGGAACTTTCTTTGTGCATGAAAGTGTTT
TCTTCTTATCTGGACTTCCATTTATATGGATCGAGAGGGCAGGATGGTTGAGCAAGTACA
AGATTCAGGCGAAAAATAATAGCCCTGCTGCTCAGGAAAAATGTGTTGTTCGCCTGTTGC
TATATCATTTTGGTGTCAATCTACCTGTTATGATTTTTTCATATCCCATCTTCAGATACA
TGGGCATGCGGAGTAGTCTTCCCCTACCATCATGGAACATAATTTTAACTCAAATAATGT
TTTACTTCATTTTGGAGGACTTCATATTCTACTGGGGACACAGGATATTGCACACAAAAT
GGTTATACAAGCATGTCCACAGTGTACATCACGAGTATGCGACACCATTTGGACTTACTT
CGGAATATGCTCATCCTGCTGAAATACTTTTCCTTGGGTTTGCAACCGTTATCGGTCCTG
CCATCACTGGGCCCCACTTGATAACTTTGTGGTTATGGGTGTCTCTTAGAATCCTAGAGA
CAGTTGAGGCGCATAGTGGTTACCATTTTCCTTGGAGTCCCTCAAACTTCTTACCATTAT
ATGGCGGATCTGATTTCCACGATTATCATCACCGTTTGTTGTACACTAAGTCTGGAAACT
ATTCATCAACTTTCACTTACATGGACCGGTAAGTATCAAACATATTTTTTCCTTTAAGGA
TACTTGTTATCTTTTCTTAGAGTATTTGGAACTGCAAAAACATTTTAAGCCTAGAATGTA
TCAAAACTGCAAAAACATCCCTGAATGTGTCTTTCCTTAGTGAGTTTGGTCCTTGAATTC
ACTAACAAAAGACACATTCTGGGATGCTTTTGTAAATTGTTATTCCAATACTCTCAACGA
CTACAGTGACACCGCCTCACACTTTTTGGGACCAAATTGACGGTTTACTTAATTTTTTAC
TGATAAGGGTACATGACTTTTTGCTATGTATTAGGATATTTGGAACTGATGTAGGATACA
GA
SMO4-2
CCTCAGTTGTGACTGACTTGGACGCCGTGTCTTTCTTTCTTCTTTCTCTATGCTATGGCG
TTCATCATCGAATCTGCTTGGCAGTACTTGATTACAAATTTCAGTGACTTTCAATTGGCA
TGTTTGGGGAGTTTCTTTCTGCATGAAAGTGTTTTCTTTTTATCTGGGCTTCCTTTTATT
TGGCTTGAGAGGGCAGGATGGCTGTCAAAATACAAAATTCAGGCAAAAACTAACAGCCCT
GCAGCTGAGGAGAGATGTATCATTCGCTTATTGGTGTATCATTTTGGAGTCAATCTACCT
GTGATGATTTTTTCATATCCTGTCTTCAAATACATGGGCATGCAGAGTAGCCTTCCTCTT
CCGTCCTGGAGAGTAGTTCTAACGCAAATAATATTTTACTTCATTTTGGAGGATTTTGTA
TTCTACTGGGGACATAGGATACTTCACACAAAATGGTTGTACAAACATGTACATAGTGTT
CATCACGAGTATGCTACACCGTTTGGACTTACTTCTGAATATGCTCATCCTGCTGAGATA
CTTTTCCTTGGATTTGCTACCATTGTTGGTCCTGCTATCACTGGACCTCACTTGATTACT
CTTTGGCTATGGATGGTTCTTAGAGTCCTTGAGACGGTTGAGGCACATTGCGGTTATCAT
TTCCCGTGGAGTCCCTCAAACTTCTTACCACTTTATGGGGGAGCTGATTTTCATGACTAT
CATCACCGTTTGTTGTACACTAAGTCTGGAAACTATTCATCAACCTTTACATACATGGAC
CGGATATTTGGAACTGATACAGGATACAGAAAGTTGAAAGCATTAAAGAACATTGGAGTT
GAATACAGTAGCGAACAAAAGAAACAGTGAGGAAGGGAACAAATTGTAGATATCTAGAAC
CATTGAAAAGGTTGATTTCCAAACTTAAGGGAAATTTTGAAAATTGTATTGTCTTGTTCT
GTAATTTGGTAGCTGTTGTTGTTGACAGCATATGGATTGTTTTGGACATGCATGCCCTGT
AATCTAGAAAAGTTACTGTGCATCTATTTTGTTGATTCCAATTCTTTCTTGGCAAACATT
GACTATTGTTGGATTTAAACCAGTTGAATGAAATGAAAGAGGCAATTCA
SMO4-3
TCTTGTTGTGGGATAGCCTTCGGTTCTGCCTCCCCTTTCCACTTCTTCTACTCTCCATCA
CTTATTCTCAAATTTCGCTTATGGCATCTTTCTTCGAATCTGCTTGGCAGTACTTGATTA
CACATTTCAGTGACTTTCAACTGGCATCTTTGGGAACTTTCTTTGTGCATGAAAGTGTTT
TCTTCTTATCTGGACTTCCATTTATATGGATCGAGAGGGCAGGATGGTTGAGCAAGTACA
AGATTCAGGTCTGAAGTTGCCAAAATTTGCTATTTATCTTTATGTTGTAGATTCATACTT
TTGTTCCCGCGATATGAATTTTATCCCTCATTTTTTCTTTTCTTTCACTTAAACAAATTT
TAGAAAGTTGTATTTGGAAATACATCTTTTGCAACTGAACCGTTCCATCATTGTTCGCTT
CGACATAATATGTATATTGCATAGCACACACATTGTTATTCATTTCAATTATTCACTTTA
CCCTGCTTTCAATGTTTCAAATATCGGCCATGGCACATTTTTTGACAATCGGCAATTTGT
GAACGATGGCACTTGGCAGCATTATGGCATTTAATGGTGGTGAGGTCAGCTTAATGACAA
TCCTCCATGCACAATCGATAACACTGTCTGCTTTCCATGGTGCTAAGGACAGTGTTATCT
AGACCTTTACAAGTGAAAATTCCCCGAGATTTCCCTTTTCAACTTTCTCTTCCTTATTTG
TATGTGTTGCATAATAACAACAAAGGTGGTAAGGTGGATTCTCAACCTCTTAGTTGGCTT
TCCACATAATATTTCTCTCCAAATTTAGATCGTTTTAGTTTCCAGATCACATCACATGAT
GTGGCTGCAATACTGTAGTTTTAGAGTCCACAACACTGCATGCTGCAGTGCTTAGTTTGA
ATAACTAATTGCGAGTGTTCAGTTTTTTTTTCTCTTCTTGAGGCTTGTGCATGTTATATT
TGATTAACATATTAACTGAATTCCTGCAATACCGGTAGGAAATTACAATTATTTTTCACT
TTTACTTGTATACTTCCACTGTATTTCTATTATCACGACTCC
C5-SD2
TCATTTCAACTTTTATTTAATTGTTACATAATACATTTAAGGACAATGACAAGTAATAAT
ATGCCAATTTAACACTTACTTAATATGACAAAGTAACAATTGCGTCAGATACAGGGTAGC
CCCCCGTTTTAACCCTAAACATTGTCTCTACTTTCAAACATCACACGCACAATAAAATTA
CACTGAACATTTAACCAATGAAACCGAGCCGAGCCTTCATCATCCAAACTAATCACATCA
CTTTGCCTCCGTCTTCCTCGGGGTCACGAAGAGTACCGAACATCCAATCCATCCATATGG
TGTAATGACCATAGTTATGGCGATACGTCGTATGATGAATGGTGTGGTAACCAGCTCCCA
TAACAGGCCACAATTTTCCATGAATGCAATCATGAATATTTGCAGTCCAGACAGCTTCAA
TGAATAAGAGCATCAAGTGTGCAAGAAAATGGACTGGAACAATAAACAAACAAAGGGTAT
GTGGTAATGCTTGAAGTATCCCATCAAGAGGATGAAAAGCCAAACCAGCAAATGGGGAGA
GAGTATTCTGTTTATTGTAGATGTGATGTGTTGCATGGAGATATTTGTAAAGTGGTTTTA
TGTCATGCAGCTCTCTGTGCACCCAATAAATACAGAACTCTACAATAACCATATAAATCG
CTAAATAACCGATGTATTCAACCCAACCAACATTATTCATTCTAGGATAGGACTTTGTCC
AGCCAAGTTCTGTCATGTACTCTGAAACAGTTGGAAGCAAAGTGTACCAATGCATGGCTT
TCAAAGCAACCGATATTTGCAAGAACATGGCTCTACGTGATGGAATCGCATCTTTAGGGA
GATAAACATTGCGTTTCCAATAGTAAATGTAGAAGCACCATAAGAAACCAGAGATTAAGT
AAAGAAGAACACCAGCAATGTAGTTTCGAAGCCATGTTTGGAAGAAACGTGGAAGTGGGA
CCCACAAGGATTGTGGTAACAAGAAACCGAGTACAATGTTGTTGTATAACTCTGTGTCTT
GTATGAAGAGATTACAGTAATCGGTTGTTGGGTCTTGTTCCATTGTTGGAACCAGAAGAA
AAGATGAAGAAGACGATGGAACAGTGACAGTGGAGAGAGAGAGAGAGAGAGAGAGAAATA
GAAGAGCACGTGGGAAACGAGAGAGAGAGAGAGAGAGCTAGACGTGTATGCAATTGGGAC
7-DR2
TCTTAATTCAAGATTGGATTAATGCAGAACCAACTGAATTTCTAGCTTATATATACAAGA
ACTCAATGGCGGGGAATTTTGTCAAGAAAAATAAGGGAGATTCCTATTTATGGGAAGCAA
AATTATTTCTTCAAAACATTATTGATGTTCCCAGTGCAACACTAGTTATTGATAAACACA
GCTCTAGAACCAATCTAACTAACACTCGCTTACAACATAAGGTTCAATAACTACTGAATT
ATTTCTTACAGCTAAAGTTTAACATTGCATCTTAAGTGGCAGAGGAAGTACACAAAAAAA
AAGGTAAACATGGCACCAAGTGAAGGATTCCAGACAAATCATCATCAATATATTCCTGGA
ATGATTCTGTAAGGTACCCTGTCGCAATAGAGTTTCCAGTACTTGCCATACTTGGATCTG
CATCGATCGTCATCCCTTTTCGCTCGGTCAAAAAGAAGGATGGTAAGAAACATCAGGTAG
AAGTAAGGCAAAAAGTGATTGAACAGAGCTGGGACTGTCCAGAAGAATGCAGCTAGTATT
TCAGGGACATAATGAAAATGACGAGCTAATCCCCACCATCCAGAGGTTAGAAGAAGGCTT
CTTTTGGTTTCCCCGGAAGTAGTAGTATATGAGGCTTCTATCTTTGATGGAGCTTTTCCC
CAGACCAAGCCTTTTCCGTTTGTCCTACGAAACTCTTGCCTTTGCCTATCACAATCATAG
TTGATGTATACGCACAGAATGCCCGCCACTAAAATAAAGAGTGCTAGCTGGGTGCCAAGA
TTTACTGGATGGTTGACAAGGTACATTCCAGGAGATGTATAGATTGATGGAACCCAAACC
AAACAACCCCAGCAAATATAAAATCCAGCTCGATCATGTGCAATATCCATTGTGCTCCAG
TATCCAGCTTCCCACCAGAAAAACTTGGTAACATACACCAGCATTAATATAGTATTTACA
AGCATTGAGTCAGCTACTTTCCCATTTTCTTCATACTGCTTTATGCAATAGGTAAGTGCA
AGGACAGCCCATGACATCATTCCAAATCTGCAGTTTGTGAAAACTTTTATGTCAAAATAT
TTTCCAATGCGTGGATAAAGCTCCATACCCCAGTAAAAATCGATGATTATGTTTCCACAT
GAACCAGAATCAGTTGAAGATGGTGCCAAATGACCTTTTAGGTATAAGAAAATACAAAAG
ATTAAGCTCCCAAAGATGAGTGTTGAAAATATCTCCCCCAAATGATCATAAACGATTGTT
GGGTTGAATATCCCAAACCACCAAAGAGCAACATAAGTAACCAAAGTAACTAAATATGCA
GCAATACCATTTGCCTTATAGACAGGACGGTTACCGGCGGGAGAAATAGGACCGTAAACA
GTTTCACCAGGAAGAAGAAGCTGAAGTGCGGCTTCAAATGCACCGTAAACAGCAATAATT
TGGCAAGCGAGAAGTGTTGGTTTAGGCCATAGATTAATAAAACCTTGTAAACCATTATTT
TTCAAGTAATCGAAACTCTTCAAAATGGATCCATCCGCAGCCGTCATTGTATACCATAGT
AGAATGACGAAAGGAGGACAAAGTGTGAGGAGAGATATCATGGAAGCATATGTGACGAGT
GCTGAATGCACCGTATCGTTCTTCTTCGATTCCACCATTATCGATCTTCTTGACTTTTAC
TTGTTTGTGTTAATGTGAGTGAGAGAAAGAAAGAAAGAAAGAAATAAACAAACTACAGTC
ACACTAAGACTAGCGACGACTATAAAATGTGCATTTCCATCCACAAATCCTACCTACCAA
ATTTAACTCTACTCACCCTGGTATGTTGCTTCTTTC
CYP90B50
AGCACCCTTCCTTACACACATTCATTACCTCTGATTCCATTCAAAGAAACTCTTTATTTT
AGCAAATGCGAAAAGATTCTTCTCGTTTTTTTTTAGCCCTGAAATATAATCAGAAAATTA
AGCTATCTAGCTTCATGTCTAACTCATACTTAAGTTTCTTTGTTCTTTCTTCCATTCTCG
TTCTCACTTTGATTTTCTTTTTCATGAAAAGAAAAAAAACAAAGTTTAATCTTCCACCTG
GAAGCATGGGGTTACCCTTTATTGGAGAAACCTTTGGTTATTTGAAGCCTTGCTCAGCCA
CCACTATGGGAGCATATATGGAAAATCGCATAGCAAGGTATGGTACAATTTACAAGACAA
AATTATTTGGAGAAGACACTATTGTATCAGCAGATGCAGAATTAAATAGGTTAATATTTC
AAAACCATGGAAAATTGTTTGACACTAACTATCCAAAAAGCATCGCTGAAATACTTGGGA
AATGGTCAATCTTGACTATAGTAGGTGATGTACATAGAGAGTTGAGGAATGTTTCACTCA
ACTTTATGAGCTATGCTAGACTCAAAACACATTTTTTGAAAGATTCAGAGAACAGTGCCC
TTTTGGTTCTAAACTCTTGGAAAGAAAATTGCACGATCGAAGCTCAAAGTGAAGCCAAAA
AGTTCACTTTCAATGTGATAACTAAGCAAATTATGAGTTTGGATCCACGGAATCCTGAGA
CAGAAGAGTTGAGAGATGAGTATCTCTCTTTCATGAATGGTGTTGTTTCTGCTCCTTTCA
ATTTGCCTGGAACTCCATACAGGAAAGCATTAAAGTCAAGGAAGATCATACTGAAGTTCA
TAGAGGGAAAAATGGAAGAAAGAATCAAGAGAAACCAAGAGGGAAAAAAAGATTTGGAAG
AAAATGATGATCTTTTAAATTGGGTTCTGAAGCATACAAATCTTTCCACTGATCAAATTC
TTGACTTGGTTTTGGGTATGGTTTTTGGTGGTTATGAAACTTCATCTGCAGCTACAGCTC
TAGCTATGTACTTTTTGCCTGGTTGTCCTAAAGCTATACAGCAATTAAGGGAAGAACACC
AAGCAATTGCAAGATCCAAGAAGAAAGCAGGGGAAGTTGAACTAACTTGGGATGATTATA
AAAAAATGGAATTTACTCACTGCGTTGTCAATGAAACACTACGTCTTGGAAATGTTGTGA
GGTTTGTTCACAGAAAGTCTATCAAAGATGTTCGGTTCAAAGGTTACGACATTCCATGTG
GATGGAACGTAATGCCGGTGATTTCGGCGGTGCATTTGAATCCTTCAAATTTTGAAGATC
CTCAACACTTCAACCCTTGGAGATGGCAGAGTGGAAATTGGGCAAGCCTGAACAGTAACT
TTATGCCATTCGGAGGAGGAGCAAAGATATGTCCAGGAATGGAGTTGGCTAAACTTGAAG
TGGCTGTTTTCATCCACCATATCATCCTCAAGTACAACTGGGATCTGGTCGATGTTGATG
ATAAACCTATTATACACCCTCTTGTCGATTTTCCCAAAGGTCTGCGCATTAGAGTCCAAC
GCCAACCCACTCTAATATGAATAAAATGTATCCGCCGAACCCGTCTCTAGTACCATAAAT
AAGAATAAAGCTAAGGACACTCTCTTTAACACGTATTTTTCAACACAATGGGTTCCACCA
AATTAAATTATGTTCGTGTTAGAGAGTGTGTTATTAGCATTTCTTCATAAATAATAAGAA
TCTCCTTATGATATTTGTGTTGCACATGTCAAAGGAGATGCTAGTGCCGAATAAGTCTAG
TTAATGCATGTTTGGGTTGGTTTGTTTGGTTTGTATCCTTATGATTTAGTGTGATTGTTC
ACTGCATCTGTTATGTGGTTGAGAAGTGAACTAAACTGGTTTCATGTAGGTTTTTTTTTT
TTGTTTTGTTGAGATGATTAAGTATTTACTTGTACTTCATTACGATTGGTGGTGTAATTG
TACTTTTAGTTTGATTTATGGATTTTTAATTCGATTTATGGATTTTTAATCGTCCTAGAC
GTGCTAGTTATCATTAACTTTGTTTGATTTGAAAGAAACAGA
CYP82J17
GTCCTTATATTTTCTTATCTAGAAGCAATGTACTAGTAACACAAAAAAAAATTCCGGCTC
TACAAAATTTTGCAGTTAAAATTTTGTCCGGACTCTACAAAATTTCTGATTTCGCCACTG
CTCGTCGATTTGATTGCATGTCCGGTCCAATAATCAGCTCGAACCAATTAGTACCCCAGT
TTCCGGTCCGACCGACCGGTTCGGTTTTTAAAACATTGTATAATAAAACACTAGAAATAG
CTCTCGTGTAAGAAATCAATCAGTTGACAGATCTATCCTCTCTAAAAAATGGATAGTTTC
CTTTCAGAACCAATAACTATAGTACTAGGTATACTTCTGGTGCTTCTATACAACATATGG
AAGATCAGAAATCCTAGTAACAAATTGAAGGGTATGAAACTACCGGAACCATCATTTGCC
TTACCTTTAATAGGTCACCTCCATCTACTGGGAAACCAAATCCCTCTTTCAAGAATCTTT
GGTTCTTTATCCGACAAATATGGTCCAATCTTCCAAATCCGTTTAGGAGCATACCCTACA
TTAGTTATTTCCAACAAAGAAGCAATCAAAGAGTGTTTTACCACAAATGACAAAATCTTA
GCTTCAAGACCAAAGTCAACTCATGGAATCCTCCTTGGTTATAACCATGCTTCCTTTGCT
TGTGCACCTTATGGCAGATTTTGGGCTAAGATAAGAAAGTTAACCATGCTTGAATTACTC
TCGTCTCGCCGCGTCGAATCGTTGAGACATGTTTATGAATCGGAGATAGATACTTTGATT
AAGGATCTTTCATTGTATGTTAAGGTTGGAAAGGTTGAGGTTGTGATTAGTGAATGGATG
GAAAGGTTAACATTTAATATAATAACAAAGATGATTTGTGGGAAAAGGTATTTTGAGTAT
TTGCAAGATGTAGATGATGTAGAAGCTAATGGTAATATTGTGAAACTGATAAAGGAAGTT
ATGCATATTTCGGGTGAGCTTGTTCCTAAGGATGTGATTCCAATTCTTGGCTGGTTTGGT
TTTGAGGGAGAAGTGCTTAAATCTATGAAAAGAGTTTCTAGAGATTTGGATGAAGTTGTT
GGAAAATGGGTTGAAGAGCATATTGAGAAGAGTGATGATGGTGTTAATAATTCAAATGAA
AAACAAGATCTTATTGATGTGATGCTTTCTGTGATTGAAGATGATCCTGATTCTGGTAAT
GACCGTGATACTATCATCAAGGCAAATATTGTGAATCTTATGATTGCTGGGTCAGACACA
ACATCAACGACAATGACATGGATCCTAGTCCTATTGTTGAATAATATGAATGCATTAAAG
CGTGCACAAGAGGAAATTGACCAGCACATAGGTAGGGATAGAAAAATAGAATCATCAGAT
ATAAAAAACTTAGTTTATTTACAAGCAATTGTGAAAGAGACTTTGAGGTTACACCCAACA
CTTCCATTATCAATACCCCACGAAGCAACAGAAGATTGTAACATTCAAGGTTACTATGTA
CCCAAAGGGACACGTCTCTTTACTAATGTGTGGAAATTACATAGAGATCCAAGTATTTGG
TTAGAGCCTGAAAAGTTTTCACCTGAAAGGTTTATTAATGAGAATGGAGAAATTGATCAT
GAAAGTCATCAATTTGAATACCTTCCTTTTGGATTAGGGAGAAGAGCTTGTCCTGGTTCT
ATGTTTGCTACACAAGTTATTCATATTACACTTGCTCGTTTGCTTCATGGGTTTGATTTG
GAAGTGCCAATGGATGAAGTTGTTGATATGAGAGAAGGGTTGGGTGTAACCTTGCCCAAG
TTAACTCCAGTGCAAGTTCTTTTAACCCCACGATTATCATGTAAACTCTATCAATTATAA
ACATTTTTTTTTGTGTGTGACTCGGATTTTCTATGGGTACAACTGTAAGTTTAATCTCTC
GAATCAGGTAGAACTACTATAGACAGTAAAGCTCTCCATCAAAAGTTTTAAAGAAACGCA
CTATTAGTACTTTAAGGATCTCTAATTAAGTTGAATGAGATTCACCATCCATCTCAATCA
AAATTCAAACACAATAAGGTGTTGTGTGTTTCTTTTTAAGATCTACAAATTTGCATGCTT
GTTTACTGTTTTTTTTTTTTACACAATCCATCCA
CYP72A613
TGGCGAACCAGCTTCGATTGTAACTGCAAAAAGAATTAAAGAAAAACACAACCATTTCCT
TTTTTCAATATAAAGCCTGAGGTTTTTGAACCCTTTCACAACAACAGTGTCGTGAAGGTG
AAGCATGATCAGTTTTAGGCTAGAGCAGGGGAACAAACTCGAGATTAATTCAGAAACAAC
CCAACCTTAATATTGGAGCGAAAATTGTTCAAATTTATAAACAACTTAGACCCGTGGTTT
CTTATATGAATCAACAGTGTCTTATTTTAAGGAAATTCATGTTTCCAGATAAACTAAGTT
AAGCTACGAAGTAACTCCATTGGATATGCTCTTACAGTTTATGCAAAATGATGCTTGCAC
CATTTTTTGGCTGAAAAGTAAGCACCGTGGTAGGAACATGCACATAATTAGGAGAAAGCT
CAAATGTGAAATTCTGCAGCAACAATGTTATCGCTATCTTTGCTTCTAACAAGGCAAAAT
TTTGTCCAAGACAAATTCTAGGACCCCATCCAAAAGGGAAATAGGAAACTTGGCCTTTTG
TTGCTTTTGCAATTCCTTCAGCAAACCTTTCAGGTTTGAACTCCTTTGCATCATCACCCC
ATATATCATGATCTTGGTGAATCAAAAGTATTGGTAGGGAAACTTGTGTTCCTGATGGCA
GCAAAAGGTTTCCAAGTTTCAAATTCTTTCGAAGAGCTCGGCTGAAGAAAACCAAAGGTG
GGTATAACCTTAGTACCTCATACAAAATCATGGTTACAATTTTCAGTCGACTTAATCCTT
CGAAGTTTGGATTTTGTTTCCCAAAAAGTTGCAAAACTTCCTGCCTTGCACGTGCTTGCC
ATTCAGGATACCTGCCTAATAACACCATTGTCCAAACCAGCAAAGTTGAGGTGGTCTCTT
GCCCAGCAAGGTAAAACAATTTGCATTCATCTATCACTTCCTGGGTGGTCATTCCAATAC
TCTTATGGTTTCCATGTCCTTGATTTTCAGCATGATTTGATTGCAGAAGTATGCCTAATA
AATCGTCATTGGTGGTTTCATCATTCTTCAGCGCTTTTTCTCGTTTTTGAATGATTCCCT
CAAGTAAATCAAGGATTTCTCTTTCATTTTCTTTCATCCTCCCCTTGGTAGTTGTTGTCA
GAAGCCGCCTTAATGGATTGTTTGTGTGTGGTGCTGTCATCAAAAGAAATCCCTGCGTCT
TCAGAAGTTGAAATAGTCTTGTTCCTTCTGCATAGCTGCTTCCAAACGCTGTTCTAGAAA
TTACATCACATGTCAAATTCTGTAGGAAAGGCCAAACATCAACTTCACATGTTCCATCTG
ATGACAATAATCCCTTCCATTCGCTTATCATTTCATTGCAACTGTGAGAAAATGCAGGCA
GCATACCTTTCAATTTTTCTATGTGGAATGCCGGATTGACGATCTTTCGATGTTTAGCCC
ATTTCTCACCCTCATATTGTATTGTACCAACGCTAAAATACTTGGCAATAGAACTTAACT
TTGGTTTGGGGAAGTCCTCAATCTTGTTAAAAACTTCCTTAATTTGCTCAGGATCTGTGA
TGACAACCTTTGGTGTTGTGCCTTCCCATAAAAAGGATTTCTTTCCATATTTGTGTACAG
TTTGATGAACAGGTGAGAAGATAGATGGTGCAGCTTGTTTGGAGAGACCAATAGATTTAG
ATTCAGCTTCTTGTTGCAACTTCAAGATATAATCTTGTTTTGAGTTGTTCATAAATAGTG
CTGAAAGCTTATATGGGTCACCTTGAAGACCTTGAGCTTTGAGGAGTTTTTCAAACCTCT
TTGGCTTAAGCCAAAATTTGTTGAGCAGATACCATGGAATCACAGCAAGTACAATTGTCA
GAACCCAGATTATTATTGTTCCTGTTGGAAACAAAATCACCATTTTTCTTTGTTTGTTTG
TAACTATTGATTGAAGTACGGCTTTTGTTTTGGCCGTATACGTCTATGAAATTGAAAATT
TTATGGCTGAAAAAATTAAAAATGATTTAATTCAAGATTTTCCTTAGTTTGTTTGGTTGG
GAGAAGAAATTGAGAAGAGAGAAGTACCTGAGAAAGAGG
